# Supplementary material for: Screening and identification strategy for 317 pesticides in fruits and vegetables by liquid chromatography-quadrupole time-of-flight high resolution mass spectrometry
Source: Royal Society of Chemistry journal article supplement (doi:10.1039/c5ay01478f), 2015-01-01
Supplement: c5ay01478f1.pdf [file c5ay01478f1.pdf]

**Table S2** Validation results of each analyte in selected matrix at three concentration levels (CU-cucumber, OR-orange)

| Compound             | Detected per commodity (n=3) |     |        |     |      |     | Identified per commodity (n=3) |     |        |     |      |     | Blank |   |
|----------------------|------------------------------|-----|--------|-----|------|-----|--------------------------------|-----|--------|-----|------|-----|-------|---|
|                      | low                          |     | middle |     | high |     | low                            |     | middle |     | high |     |       |   |
|                      | CU                           | OR  | CU     | OR  | CU   | OR  | CU                             | OR  | CU     | OR  | CU   | OR  |       |   |
| 1,3-Diphenyl urea    | 3/3                          | 3/3 | 3/3    | 3/3 | 3/3  | 3/3 | 3/3                            | 3/3 | 3/3    | 3/3 | 3/3  | 3/3 | 3/3   | - |
| 1-naphthyl acetamide | 3/3                          | 3/3 | 3/3    | 3/3 | 3/3  | 3/3 | 3/3                            | 3/3 | 3/3    | 3/3 | 3/3  | 3/3 | 3/3   | - |
| 3,4,5-Trimethacarb   | 0/3                          | 0/3 | 3/3    | 3/3 | 3/3  | 3/3 | 0/3                            | 0/3 | 3/3    | 3/3 | 3/3  | 3/3 | 3/3   | - |
| Acetamiprid          | 2/2                          | 3/3 | 2/2    | 3/3 | 2/2  | 3/3 | 0/2                            | 0/3 | 2/2    | 3/3 | 2/2  | 3/3 | 3/3   | 1 |
| Acetochlor           | 0/3                          | 0/3 | 3/3    | 3/3 | 3/3  | 3/3 | 0/3                            | 0/3 | 3/3    | 3/3 | 3/3  | 3/3 | 3/3   | - |
| Aldicarb             | 0/3                          | 2/3 | 3/3    | 3/3 | 3/3  | 3/3 | 0/3                            | 0/3 | 0/3    | 0/3 | 0/3  | 0/3 | 0/3   | - |
| Ametryn              | 3/3                          | 3/3 | 3/3    | 3/3 | 3/3  | 3/3 | 3/3                            | 3/3 | 3/3    | 3/3 | 3/3  | 3/3 | 3/3   | - |
| Ancymidol            | 3/3                          | 3/3 | 3/3    | 3/3 | 3/3  | 3/3 | 0/3                            | 3/3 | 3/3    | 3/3 | 3/3  | 3/3 | 3/3   | - |
| Anilofos             | 3/3                          | 3/3 | 3/3    | 3/3 | 3/3  | 3/3 | 2/3                            | 1/3 | 3/3    | 3/3 | 3/3  | 3/3 | 3/3   | - |
| Aspon                | 3/3                          | 0/3 | 3/3    | 3/3 | 3/3  | 3/3 | 0/3                            | 0/3 | 3/3    | 3/3 | 3/3  | 3/3 | 3/3   | - |
| Atratone             | 3/3                          | 3/3 | 3/3    | 3/3 | 3/3  | 3/3 | 3/3                            | 3/3 | 3/3    | 3/3 | 3/3  | 3/3 | 3/3   | - |
| Atrazine             | 3/3                          | 2/3 | 3/3    | 3/3 | 3/3  | 3/3 | 0/3                            | 0/3 | 3/3    | 3/3 | 3/3  | 3/3 | 3/3   | - |
| Atrazine-Desethyl    | 3/3                          | 3/3 | 3/3    | 3/3 | 3/3  | 3/3 | 0/3                            | 3/3 | 3/3    | 3/3 | 3/3  | 3/3 | 3/3   | - |
| Azamethiphos         | 3/3                          | 3/3 | 3/3    | 3/3 | 3/3  | 3/3 | 0/3                            | 3/3 | 3/3    | 3/3 | 3/3  | 3/3 | 3/3   | - |
| Azinphos-ethyl       | 3/3                          | 3/3 | 3/3    | 3/3 | 3/3  | 3/3 | 3/3                            | 3/3 | 3/3    | 3/3 | 3/3  | 3/3 | 3/3   | - |
| Azinphos-methyl      | 3/3                          | 3/3 | 3/3    | 3/3 | 3/3  | 3/3 | 0/3                            | 0/3 | 0/3    | 0/3 | 0/3  | 0/3 | 0/3   | - |
| Azoxystrobin         | 2/2                          | 3/3 | 2/2    | 3/3 | 2/2  | 3/3 | 2/2                            | 3/3 | 2/2    | 3/3 | 2/2  | 3/3 | 3/3   | 1 |
| Benalaxyl            | 3/3                          | 3/3 | 3/3    | 3/3 | 3/3  | 3/3 | 3/3                            | 3/3 | 3/3    | 3/3 | 3/3  | 3/3 | 3/3   | - |
| Bendiocarb           | 1/3                          | 0/3 | 3/3    | 3/3 | 3/3  | 3/3 | 0/3                            | 0/3 | 0/3    | 3/3 | 3/3  | 3/3 | 3/3   | - |
| Benodanil            | 3/3                          | 3/3 | 3/3    | 3/3 | 3/3  | 3/3 | 0/3                            | 0/3 | 3/3    | 3/3 | 3/3  | 3/3 | 3/3   | - |
| Benoxacor            | 3/3                          | 3/3 | 3/3    | 3/3 | 3/3  | 3/3 | 0/3                            | 0/3 | 3/3    | 3/3 | 3/3  | 3/3 | 3/3   | - |
| Bensulide            | 3/3                          | 3/3 | 3/3    | 3/3 | 3/3  | 3/3 | 3/3                            | 0/3 | 3/3    | 3/3 | 3/3  | 3/3 | 3/3   | - |
| Benzoximate          | 1/3                          | 1/3 | 3/3    | 3/3 | 3/3  | 3/3 | 0/3                            | 0/3 | 3/3    | 3/3 | 3/3  | 3/3 | 3/3   | - |
| Benzoylprop-ethyl    | 0/3                          | 0/3 | 0/3    | 0/3 | 0/3  | 0/3 | 0/3                            | 0/3 | 0/3    | 0/3 | 0/3  | 0/3 | 0/3   | - |
| Bioallethrin         | 0/3                          | 0/3 | 1/3    | 3/3 | 3/3  | 3/3 | 0/3                            | 0/3 | 0/3    | 0/3 | 0/3  | 0/3 | 0/3   | - |
| Bitertanol           | 0/3                          | 2/3 | 0/3    | 3/3 | 3/3  | 3/3 | 0/3                            | 0/3 | 0/3    | 0/3 | 3/3  | 3/3 | 3/3   | - |
| Bromacil             | 3/3                          | 3/3 | 3/3    | 3/3 | 3/3  | 3/3 | 0/3                            | 3/3 | 3/3    | 3/3 | 3/3  | 3/3 | 3/3   | - |
| Bromfeninfos         | 3/3                          | 3/3 | 3/3    | 3/3 | 3/3  | 3/3 | 3/3                            | 3/3 | 3/3    | 3/3 | 3/3  | 3/3 | 3/3   | - |
| Brompyrazon          | 3/3                          | 3/3 | 3/3    | 3/3 | 3/3  | 3/3 | 0/3                            | 3/3 | 3/3    | 3/3 | 3/3  | 3/3 | 3/3   | - |
| Bromuconazole        | 3/3                          | 3/3 | 3/3    | 3/3 | 3/3  | 3/3 | 0/3                            | 0/3 | 3/3    | 3/3 | 3/3  | 3/3 | 3/3   | - |
| Bupirimate           | 3/3                          | 3/3 | 3/3    | 3/3 | 3/3  | 3/3 | 3/3                            | 3/3 | 3/3    | 3/3 | 3/3  | 3/3 | 3/3   | - |
| Buprofezin           | 3/3                          | 2/2 | 3/3    | 2/2 | 3/3  | 2/2 | 3/3                            | 2/2 | 3/3    | 2/2 | 3/3  | 2/2 | 2/2   | 1 |
| Butachlor            | 0/3                          | 0/3 | 3/3    | 3/3 | 3/3  | 3/3 | 0/3                            | 0/3 | 3/3    | 3/3 | 3/3  | 3/3 | 3/3   | - |
| Butafenacil          | 3/3                          | 3/3 | 3/3    | 3/3 | 3/3  | 3/3 | 3/3                            | 3/3 | 3/3    | 3/3 | 3/3  | 3/3 | 3/3   | - |
| Butamifos            | 3/3                          | 2/3 | 3/3    | 3/3 | 3/3  | 3/3 | 0/3                            | 0/3 | 3/3    | 3/3 | 3/3  | 3/3 | 3/3   | - |
| Butralin             | 3/3                          | 0/3 | 3/3    | 3/3 | 3/3  | 3/3 | 0/3                            | 0/3 | 3/3    | 3/3 | 3/3  | 3/3 | 3/3   | - |
| Cadusafos            | 3/3                          | 3/3 | 3/3    | 3/3 | 3/3  | 3/3 | 3/3                            | 3/3 | 3/3    | 3/3 | 3/3  | 3/3 | 3/3   | - |
| Cafenstrole          | 3/3                          | 3/3 | 3/3    | 3/3 | 3/3  | 3/3 | 0/3                            | 0/3 | 3/3    | 3/3 | 3/3  | 3/3 | 3/3   | - |

| Compound                 | Detected per commodity (n=3) |     |        |     |      |     | Identified per commodity (n=3) |     |        |     |      |     | Blank |
|--------------------------|------------------------------|-----|--------|-----|------|-----|--------------------------------|-----|--------|-----|------|-----|-------|
|                          | low                          |     | middle |     | high |     | low                            |     | middle |     | high |     |       |
|                          | CU                           | OR  | CU     | OR  | CU   | OR  | CU                             | OR  | CU     | OR  | CU   | OR  |       |
| Carbaryl                 | 3/3                          | 2/3 | 3/3    | 3/3 | 3/3  | 3/3 | 0/3                            | 0/3 | 3/3    | 3/3 | 3/3  | 3/3 | -     |
| Carbendazim              | 1/1                          | 3/3 | 1/1    | 3/3 | 1/1  | 3/3 | 1/1                            | 3/3 | 1/1    | 3/3 | 1/1  | 3/3 | 2     |
| Carbetamide              | 0/3                          | 3/3 | 3/3    | 3/3 | 3/3  | 3/3 | 0/3                            | 0/3 | 3/3    | 3/3 | 3/3  | 3/3 | -     |
| Carbofuran               | 3/3                          | 3/3 | 3/3    | 3/3 | 3/3  | 3/3 | 0/3                            | 0/3 | 3/3    | 3/3 | 3/3  | 3/3 | -     |
| Carbofuran-3-hydroxy     | 3/3                          | 3/3 | 3/3    | 3/3 | 3/3  | 3/3 | 0/3                            | 3/3 | 3/3    | 3/3 | 3/3  | 3/3 | -     |
| Carbophenothion          | 0/3                          | 0/3 | 0/3    | 0/3 | 3/3  | 0/3 | 0/3                            | 0/3 | 0/3    | 0/3 | 0/3  | 0/3 | -     |
| Carboxin                 | 3/3                          | 3/3 | 3/3    | 3/3 | 3/3  | 3/3 | 0/3                            | 0/3 | 3/3    | 3/3 | 3/3  | 3/3 | -     |
| Carfentrazone-ethyl      | 3/3                          | 3/3 | 3/3    | 3/3 | 3/3  | 3/3 | 0/3                            | 0/3 | 3/3    | 3/3 | 3/3  | 3/3 | -     |
| Carpropamid              | 3/3                          | 0/3 | 3/3    | 3/3 | 3/3  | 3/3 | 0/3                            | 0/3 | 0/3    | 3/3 | 3/3  | 3/3 | -     |
| Chlorfenvinphos          | 2/3                          | 3/3 | 3/3    | 3/3 | 3/3  | 3/3 | 0/3                            | 0/3 | 3/3    | 3/3 | 3/3  | 3/3 | -     |
| Chloridazon              | 3/3                          | 3/3 | 3/3    | 3/3 | 3/3  | 3/3 | 0/3                            | 1/3 | 3/3    | 3/3 | 3/3  | 3/3 | -     |
| Chlorotoluron            | 3/3                          | 3/3 | 3/3    | 3/3 | 3/3  | 3/3 | 0/3                            | 3/3 | 3/3    | 3/3 | 3/3  | 3/3 | -     |
| Chloroxuron              | 3/3                          | 3/3 | 3/3    | 3/3 | 3/3  | 3/3 | 0/3                            | 3/3 | 3/3    | 3/3 | 3/3  | 3/3 | -     |
| Chlorpyrifos-ethyl       | 3/3                          | 3/3 | 3/3    | 3/3 | 3/3  | 3/3 | 1/3                            | 2/3 | 3/3    | 3/3 | 3/3  | 3/3 | -     |
| Chlorthiophos            | 3/3                          | 0/3 | 3/3    | 3/3 | 3/3  | 3/3 | 0/3                            | 0/3 | 0/3    | 0/3 | 3/3  | 3/3 | -     |
| Chromafenozide           | 3/3                          | 3/3 | 3/3    | 3/3 | 3/3  | 3/3 | 3/3                            | 3/3 | 3/3    | 3/3 | 3/3  | 3/3 | -     |
| Cinmethylin              | 0/3                          | 1/3 | 3/3    | 3/3 | 3/3  | 3/3 | 0/3                            | 0/3 | 3/3    | 0/3 | 3/3  | 3/3 | -     |
| Clomazone                | 3/3                          | 2/3 | 3/3    | 3/3 | 3/3  | 3/3 | 2/3                            | 1/3 | 3/3    | 3/3 | 3/3  | 3/3 | -     |
| Cloquintocet-mexyl       | 3/3                          | 0/3 | 3/3    | 3/3 | 3/3  | 3/3 | 0/3                            | 0/3 | 3/3    | 3/3 | 3/3  | 3/3 | -     |
| Clothianidin             | 3/3                          | 3/3 | 3/3    | 3/3 | 3/3  | 3/3 | 0/3                            | 1/3 | 3/3    | 3/3 | 3/3  | 3/3 | -     |
| Crufomate                | 0/3                          | 1/3 | 3/3    | 3/3 | 3/3  | 3/3 | 0/3                            | 0/3 | 0/3    | 0/3 | 0/3  | 0/3 | -     |
| Cyanazine                | 3/3                          | 3/3 | 3/3    | 3/3 | 3/3  | 3/3 | 0/3                            | 0/3 | 3/3    | 3/3 | 3/3  | 3/3 | -     |
| Cycloate                 | 3/3                          | 0/3 | 3/3    | 3/3 | 3/3  | 3/3 | 0/3                            | 0/3 | 3/3    | 3/3 | 3/3  | 3/3 | -     |
| Cycluron                 | 3/3                          | 1/3 | 3/3    | 3/3 | 3/3  | 3/3 | 0/3                            | 0/3 | 3/3    | 3/3 | 3/3  | 3/3 | -     |
| Cyflufenamid             | 3/3                          | 3/3 | 3/3    | 3/3 | 3/3  | 3/3 | 3/3                            | 0/3 | 3/3    | 3/3 | 3/3  | 3/3 | -     |
| Cyprazine                | 3/3                          | 3/3 | 3/3    | 3/3 | 3/3  | 3/3 | 0/3                            | 0/3 | 3/3    | 3/3 | 3/3  | 3/3 | -     |
| Cyproconazole            | 0/3                          | 0/3 | 3/3    | 3/3 | 3/3  | 3/3 | 0/3                            | 0/3 | 3/3    | 3/3 | 3/3  | 3/3 | -     |
| Cyprodinil               | 0/3                          | 0/3 | 3/3    | 3/3 | 3/3  | 3/3 | 0/3                            | 0/3 | 3/3    | 3/3 | 3/3  | 3/3 | -     |
| Demeton-S                | 3/3                          | 1/3 | 3/3    | 3/3 | 3/3  | 3/3 | 0/3                            | 0/3 | 3/3    | 3/3 | 3/3  | 3/3 | -     |
| Demeton-S sulfoxide      | 3/3                          | 3/3 | 3/3    | 3/3 | 3/3  | 3/3 | 3/3                            | 3/3 | 3/3    | 3/3 | 3/3  | 3/3 | -     |
| Demeton-S-methyl         | 0/3                          | 0/3 | 3/3    | 3/3 | 3/3  | 3/3 | 0/3                            | 0/3 | 0/3    | 0/3 | 0/3  | 0/3 | -     |
| Demeton-S-methyl sulfone | 0/3                          | 1/3 | 3/3    | 3/3 | 3/3  | 3/3 | 0/3                            | 0/3 | 3/3    | 1/3 | 3/3  | 3/3 | -     |
| Desethyl-sebuthylazine   | 3/3                          | 3/3 | 3/3    | 3/3 | 3/3  | 3/3 | 0/3                            | 3/3 | 3/3    | 3/3 | 3/3  | 3/3 | -     |
| Desmedipham              | 0/3                          | 0/3 | 3/3    | 3/3 | 3/3  | 3/3 | 0/3                            | 0/3 | 3/3    | 3/3 | 3/3  | 3/3 | -     |
| Desmethyl-pirimicarb     | 2/3                          | 3/3 | 3/3    | 3/3 | 3/3  | 3/3 | 0/3                            | 0/3 | 3/3    | 3/3 | 3/3  | 3/3 | -     |
| Diallate                 | 3/3                          | 3/3 | 3/3    | 3/3 | 3/3  | 3/3 | 0/3                            | 0/3 | 3/3    | 3/3 | 3/3  | 3/3 | -     |
| Diazinon                 | 3/3                          | 3/3 | 3/3    | 3/3 | 3/3  | 3/3 | 2/3                            | 1/3 | 3/3    | 3/3 | 3/3  | 3/3 | -     |
| Dichlofenthion           | 2/3                          | 0/3 | 3/3    | 3/3 | 3/3  | 3/3 | 0/3                            | 0/3 | 0/3    | 0/3 | 0/3  | 0/3 | -     |
| Diclobutrazole           | 3/3                          | 3/3 | 3/3    | 3/3 | 3/3  | 3/3 | 0/3                            | 3/3 | 3/3    | 3/3 | 3/3  | 3/3 | -     |
| Dicrotophos              | 3/3                          | 3/3 | 3/3    | 3/3 | 3/3  | 3/3 | 0/3                            | 3/3 | 3/3    | 3/3 | 3/3  | 3/3 | -     |
| Diethyl-ethyl            | 3/3                          | 3/3 | 3/3    | 3/3 | 3/3  | 3/3 | 0/3                            | 0/3 | 3/3    | 3/3 | 3/3  | 3/3 | -     |

| Compound             | Detected per commodity (n=3) |     |        |     |      |     | Identified per commodity (n=3) |     |        |     |      |     | Blank |
|----------------------|------------------------------|-----|--------|-----|------|-----|--------------------------------|-----|--------|-----|------|-----|-------|
|                      | low                          |     | middle |     | high |     | low                            |     | middle |     | high |     |       |
|                      | CU                           | OR  | CU     | OR  | CU   | OR  | CU                             | OR  | CU     | OR  | CU   | OR  |       |
| Diethofencarb        | 0/3                          | 3/3 | 0/3    | 3/3 | 3/3  | 3/3 | 0/3                            | 0/3 | 0/3    | 0/3 | 3/3  | 3/3 | -     |
| Diethyltoluamide     | 3/3                          | 3/3 | 3/3    | 3/3 | 3/3  | 3/3 | 3/3                            | 3/3 | 3/3    | 3/3 | 3/3  | 3/3 | -     |
| Difenoconazole       | 2/2                          | 2/2 | 2/2    | 2/2 | 2/2  | 2/2 | 0/2                            | 0/2 | 2/2    | 2/2 | 2/2  | 2/2 | 2     |
| Difenoxuron          | 3/3                          | 3/3 | 3/3    | 3/3 | 3/3  | 3/3 | 3/3                            | 3/3 | 3/3    | 3/3 | 3/3  | 3/3 | -     |
| Dimefuron            | 3/3                          | 3/3 | 3/3    | 3/3 | 3/3  | 3/3 | 0/3                            | 0/3 | 3/3    | 3/3 | 3/3  | 3/3 | -     |
| Dimepiperate         | 0/3                          | 0/3 | 3/3    | 3/3 | 3/3  | 3/3 | 0/3                            | 0/3 | 3/3    | 3/3 | 3/3  | 3/3 | -     |
| Dimethachlor         | 3/3                          | 0/3 | 3/3    | 3/3 | 3/3  | 3/3 | 0/3                            | 0/3 | 3/3    | 3/3 | 3/3  | 3/3 | -     |
| Dimethametryn        | 0/3                          | 3/3 | 3/3    | 3/3 | 3/3  | 3/3 | 0/3                            | 0/3 | 3/3    | 3/3 | 3/3  | 3/3 | -     |
| Dimethenamid         | 3/3                          | 3/3 | 3/3    | 3/3 | 3/3  | 3/3 | 3/3                            | 3/3 | 3/3    | 3/3 | 3/3  | 3/3 | -     |
| Dimethirimol         | 3/3                          | 3/3 | 3/3    | 3/3 | 3/3  | 3/3 | 0/3                            | 3/3 | 3/3    | 3/3 | 3/3  | 3/3 | -     |
| Dimethoate           | 3/3                          | 3/3 | 3/3    | 3/3 | 3/3  | 3/3 | 0/3                            | 3/3 | 3/3    | 3/3 | 3/3  | 3/3 | -     |
| Dimethomorph         | 1/1                          | 1/3 | 1/1    | 3/3 | 1/1  | 3/3 | 0/1                            | 0/3 | 1/1    | 3/3 | 1/1  | 3/3 | 2     |
| Diniconazole         | 3/3                          | 3/3 | 3/3    | 3/3 | 3/3  | 3/3 | 3/3                            | 3/3 | 3/3    | 3/3 | 3/3  | 3/3 | -     |
| Diphenamid           | 0/3                          | 3/3 | 3/3    | 3/3 | 3/3  | 3/3 | 0/3                            | 0/3 | 3/3    | 3/3 | 3/3  | 3/3 | -     |
| Dipropetryn          | 3/3                          | 3/3 | 3/3    | 3/3 | 3/3  | 3/3 | 3/3                            | 3/3 | 3/3    | 3/3 | 3/3  | 3/3 | -     |
| Disulfoton sulfone   | 3/3                          | 3/3 | 3/3    | 3/3 | 3/3  | 3/3 | 0/3                            | 0/3 | 0/3    | 3/3 | 3/3  | 3/3 | -     |
| Disulfoton sulfoxide | 3/3                          | 3/3 | 3/3    | 3/3 | 3/3  | 3/3 | 0/3                            | 0/3 | 3/3    | 3/3 | 3/3  | 3/3 | -     |
| Dithiopyr            | 2/3                          | 3/3 | 3/3    | 3/3 | 3/3  | 3/3 | 0/3                            | 0/3 | 3/3    | 3/3 | 3/3  | 3/3 | -     |
| Diuron               | 3/3                          | 3/3 | 3/3    | 3/3 | 3/3  | 3/3 | 0/3                            | 2/3 | 3/3    | 3/3 | 3/3  | 3/3 | -     |
| Dodemorph            | 1/3                          | 3/3 | 3/3    | 3/3 | 3/3  | 3/3 | 0/3                            | 0/3 | 3/3    | 3/3 | 3/3  | 3/3 | -     |
| Edifenphos           | 3/3                          | 3/3 | 3/3    | 3/3 | 3/3  | 3/3 | 0/3                            | 0/3 | 3/3    | 3/3 | 3/3  | 3/3 | -     |
| Emamectin-benzoate   | 3/3                          | 3/3 | 3/3    | 3/3 | 3/3  | 3/3 | 3/3                            | 3/3 | 3/3    | 3/3 | 3/3  | 3/3 | -     |
| Epoxiconazole        | 3/3                          | 3/3 | 3/3    | 3/3 | 3/3  | 3/3 | 1/3                            | 3/3 | 3/3    | 3/3 | 3/3  | 3/3 | -     |
| Esprocarb            | 3/3                          | 2/3 | 3/3    | 3/3 | 3/3  | 3/3 | 0/3                            | 0/3 | 3/3    | 3/3 | 3/3  | 3/3 | -     |
| Etaconazole          | 0/3                          | 0/3 | 3/3    | 2/3 | 3/3  | 3/3 | 0/3                            | 0/3 | 0/3    | 0/3 | 3/3  | 3/3 | -     |
| Ethidimuron          | 3/3                          | 3/3 | 3/3    | 3/3 | 3/3  | 3/3 | 0/3                            | 3/3 | 3/3    | 3/3 | 3/3  | 3/3 | -     |
| Ethiofencarb sulfone | 3/3                          | 3/3 | 3/3    | 3/3 | 3/3  | 3/3 | 0/3                            | 0/3 | 3/3    | 3/3 | 3/3  | 3/3 | -     |
| Ethion               | 3/3                          | 0/3 | 3/3    | 3/3 | 3/3  | 3/3 | 0/3                            | 0/3 | 0/3    | 0/3 | 3/3  | 3/3 | -     |
| Ethiprole            | 3/3                          | 3/3 | 3/3    | 3/3 | 3/3  | 3/3 | 0/3                            | 0/3 | 0/3    | 3/3 | 0/3  | 3/3 | -     |
| Ethirimol            | 3/3                          | 3/3 | 3/3    | 3/3 | 3/3  | 3/3 | 0/3                            | 0/3 | 3/3    | 3/3 | 3/3  | 3/3 | -     |
| Ethoprophos          | 3/3                          | 3/3 | 3/3    | 3/3 | 3/3  | 3/3 | 0/3                            | 0/3 | 3/3    | 3/3 | 3/3  | 3/3 | -     |
| Etobenzanid          | 3/3                          | 3/3 | 3/3    | 3/3 | 3/3  | 3/3 | 0/3                            | 0/3 | 3/3    | 3/3 | 3/3  | 3/3 | -     |
| Etrimfos             | 3/3                          | 0/3 | 3/3    | 3/3 | 3/3  | 3/3 | 0/3                            | 0/3 | 0/3    | 0/3 | 0/3  | 0/3 | -     |
| Famphur              | 2/3                          | 3/3 | 3/3    | 3/3 | 3/3  | 3/3 | 0/3                            | 0/3 | 3/3    | 3/3 | 3/3  | 3/3 | -     |
| Fenamidone           | 3/3                          | 3/3 | 3/3    | 3/3 | 3/3  | 3/3 | 0/3                            | 0/3 | 3/3    | 3/3 | 3/3  | 3/3 | -     |
| Fenamiphos           | 0/3                          | 1/3 | 3/3    | 3/3 | 3/3  | 3/3 | 0/3                            | 0/3 | 3/3    | 3/3 | 3/3  | 3/3 | -     |
| Fenamiphos sulfone   | 3/3                          | 3/3 | 3/3    | 3/3 | 3/3  | 3/3 | 0/3                            | 0/3 | 3/3    | 3/3 | 3/3  | 3/3 | -     |
| Fenamiphos sulfoxide | 3/3                          | 3/3 | 3/3    | 3/3 | 3/3  | 3/3 | 0/3                            | 0/3 | 3/3    | 3/3 | 3/3  | 3/3 | -     |
| Fenarimol            | 3/3                          | 3/3 | 3/3    | 3/3 | 3/3  | 3/3 | 0/3                            | 3/3 | 3/3    | 3/3 | 3/3  | 3/3 | -     |
| Fenazaquin           | 3/3                          | 2/3 | 3/3    | 3/3 | 3/3  | 3/3 | 0/3                            | 0/3 | 0/3    | 0/3 | 3/3  | 0/3 | -     |
| Fenbuconazole        | 3/3                          | 3/3 | 3/3    | 3/3 | 3/3  | 3/3 | 0/3                            | 0/3 | 3/3    | 3/3 | 3/3  | 3/3 | -     |

| Compound             | Detected per commodity (n=3) |     |        |     |      |     | Identified per commodity (n=3) |     |        |     |      |     | Blank |
|----------------------|------------------------------|-----|--------|-----|------|-----|--------------------------------|-----|--------|-----|------|-----|-------|
|                      | low                          |     | middle |     | high |     | low                            |     | middle |     | high |     |       |
|                      | CU                           | OR  | CU     | OR  | CU   | OR  | CU                             | OR  | CU     | OR  | CU   | OR  |       |
| Fenfuram             | 3/3                          | 3/3 | 3/3    | 3/3 | 3/3  | 3/3 | 3/3                            | 3/3 | 3/3    | 3/3 | 3/3  | 3/3 | -     |
| Fenobucarb           | 3/3                          | 3/3 | 3/3    | 3/3 | 3/3  | 3/3 | 3/3                            | 3/3 | 3/3    | 3/3 | 3/3  | 3/3 | -     |
| Fenothiocarb         | 3/3                          | 3/3 | 3/3    | 3/3 | 3/3  | 3/3 | 0/3                            | 0/3 | 3/3    | 3/3 | 3/3  | 3/3 | -     |
| Fenoxanil            | 3/3                          | 2/3 | 3/3    | 3/3 | 3/3  | 3/3 | 0/3                            | 0/3 | 3/3    | 3/3 | 3/3  | 3/3 | -     |
| Fenpropidin          | 1/3                          | 3/3 | 3/3    | 3/3 | 3/3  | 3/3 | 0/3                            | 0/3 | 3/3    | 3/3 | 3/3  | 3/3 | -     |
| Fenpyroximate        | 3/3                          | 2/3 | 3/3    | 3/3 | 3/3  | 3/3 | 0/3                            | 0/3 | 1/3    | 2/3 | 3/3  | 3/3 | -     |
| Fensulfothion        | 3/3                          | 3/3 | 3/3    | 3/3 | 3/3  | 3/3 | 0/3                            | 0/3 | 3/3    | 3/3 | 3/3  | 3/3 | -     |
| Fenthion sulfoxide   | 3/3                          | 3/3 | 3/3    | 3/3 | 3/3  | 3/3 | 3/3                            | 3/3 | 3/3    | 3/3 | 3/3  | 3/3 | -     |
| Fenuron              | 3/3                          | 3/3 | 3/3    | 3/3 | 3/3  | 3/3 | 3/3                            | 3/3 | 3/3    | 3/3 | 3/3  | 3/3 | -     |
| Flamprop             | 3/3                          | 3/3 | 3/3    | 3/3 | 3/3  | 3/3 | 0/3                            | 0/3 | 0/3    | 0/3 | 3/3  | 1/3 | -     |
| Flamprop-methyl      | 3/3                          | 3/3 | 3/3    | 3/3 | 3/3  | 3/3 | 0/3                            | 0/3 | 3/3    | 3/3 | 3/3  | 3/3 | -     |
| Fluazifop-butyl      | 3/3                          | 3/3 | 3/3    | 3/3 | 3/3  | 3/3 | 3/3                            | 3/3 | 3/3    | 3/3 | 3/3  | 3/3 | -     |
| Flucycloxuron        | 3/3                          | 1/3 | 3/3    | 3/3 | 3/3  | 3/3 | 0/3                            | 0/3 | 0/3    | 1/3 | 3/3  | 3/3 | -     |
| Flufenacet           | 3/3                          | 3/3 | 3/3    | 3/3 | 3/3  | 3/3 | 0/3                            | 2/3 | 3/3    | 3/3 | 3/3  | 3/3 | -     |
| Flufenoxuron         | 3/3                          | 1/3 | 3/3    | 3/3 | 3/3  | 3/3 | 0/3                            | 0/3 | 0/3    | 3/3 | 3/3  | 3/3 | -     |
| Flumiclorac-pentyl   | 3/3                          | 0/3 | 3/3    | 3/3 | 3/3  | 3/3 | 0/3                            | 0/3 | 0/3    | 0/3 | 0/3  | 0/3 | -     |
| Fluometuron          | 3/3                          | 3/3 | 3/3    | 3/3 | 3/3  | 3/3 | 0/3                            | 3/3 | 3/3    | 3/3 | 3/3  | 3/3 | -     |
| Fluquinconazole      | 2/3                          | 3/3 | 3/3    | 3/3 | 3/3  | 3/3 | 0/3                            | 0/3 | 3/3    | 3/3 | 3/3  | 3/3 | -     |
| Fluridone            | 3/3                          | 3/3 | 3/3    | 3/3 | 3/3  | 3/3 | 3/3                            | 3/3 | 3/3    | 3/3 | 3/3  | 3/3 | -     |
| Flurtamone           | 3/3                          | 3/3 | 3/3    | 3/3 | 3/3  | 3/3 | 3/3                            | 3/3 | 3/3    | 3/3 | 3/3  | 3/3 | -     |
| Flusilazole          | 3/3                          | 3/3 | 3/3    | 3/3 | 3/3  | 3/3 | 0/3                            | 0/3 | 3/3    | 3/3 | 3/3  | 3/3 | -     |
| Flutolanil           | 2/3                          | 1/3 | 3/3    | 3/3 | 3/3  | 3/3 | 0/3                            | 0/3 | 3/3    | 3/3 | 3/3  | 3/3 | -     |
| Flutriafol           | 3/3                          | 3/3 | 3/3    | 3/3 | 3/3  | 3/3 | 0/3                            | 3/3 | 3/3    | 3/3 | 3/3  | 3/3 | -     |
| Fonofos              | 3/3                          | 1/3 | 3/3    | 3/3 | 3/3  | 3/3 | 0/3                            | 0/3 | 3/3    | 3/3 | 3/3  | 3/3 | -     |
| Forchlorfenuron      | 3/3                          | 3/3 | 3/3    | 3/3 | 3/3  | 3/3 | 3/3                            | 3/3 | 3/3    | 3/3 | 3/3  | 3/3 | -     |
| Fosthiazate          | 3/3                          | 3/3 | 3/3    | 3/3 | 3/3  | 3/3 | 0/3                            | 3/3 | 3/3    | 3/3 | 3/3  | 3/3 | -     |
| Furalaxyl            | 3/3                          | 3/3 | 3/3    | 3/3 | 3/3  | 3/3 | 3/3                            | 3/3 | 3/3    | 3/3 | 3/3  | 3/3 | -     |
| Furathiocarb         | 3/3                          | 3/3 | 3/3    | 3/3 | 3/3  | 3/3 | 3/3                            | 0/3 | 3/3    | 3/3 | 3/3  | 3/3 | -     |
| Furmecyclox          | 2/3                          | 0/3 | 3/3    | 3/3 | 3/3  | 3/3 | 0/3                            | 0/3 | 3/3    | 3/3 | 3/3  | 3/3 | -     |
| Haloxifop-ehoxyethyl | 3/3                          | 0/3 | 3/3    | 3/3 | 3/3  | 3/3 | 0/3                            | 0/3 | 2/3    | 1/3 | 3/3  | 3/3 | -     |
| Haloxifop-methyl     | 3/3                          | 3/3 | 3/3    | 3/3 | 3/3  | 3/3 | 0/3                            | 0/3 | 3/3    | 3/3 | 3/3  | 3/3 | -     |
| Heptenophos          | 3/3                          | 3/3 | 3/3    | 3/3 | 3/3  | 3/3 | 0/3                            | 0/3 | 3/3    | 3/3 | 3/3  | 3/3 | -     |
| Hexaconazole         | 3/3                          | 3/3 | 3/3    | 3/3 | 3/3  | 3/3 | 0/3                            | 0/3 | 0/3    | 0/3 | 3/3  | 3/3 | -     |
| Hexazinone           | 0/3                          | 3/3 | 3/3    | 3/3 | 3/3  | 3/3 | 0/3                            | 0/3 | 3/3    | 3/3 | 3/3  | 3/3 | -     |
| Hexythiazox          | 3/3                          | 0/3 | 3/3    | 3/3 | 3/3  | 3/3 | 0/3                            | 0/3 | 0/3    | 0/3 | 0/3  | 0/3 | -     |
| Imazalil             | 2/2                          | 1/1 | 2/2    | 1/1 | 2/2  | 1/1 | 0/2                            | 1/1 | 2/2    | 1/1 | 2/2  | 1/1 | 3     |
| Imazapic             | 3/3                          | 3/3 | 3/3    | 3/3 | 3/3  | 3/3 | 0/3                            | 3/3 | 1/3    | 3/3 | 3/3  | 3/3 | -     |
| Imazethapyr          | 0/3                          | 3/3 | 3/3    | 3/3 | 3/3  | 3/3 | 0/3                            | 0/3 | 1/3    | 1/3 | 3/3  | 3/3 | -     |
| Imidacloprid         | 3/3                          | 0/3 | 3/3    | 3/3 | 3/3  | 3/3 | 0/3                            | 0/3 | 3/3    | 3/3 | 3/3  | 3/3 | -     |
| Indoxacarb           | 3/3                          | 3/3 | 3/3    | 3/3 | 3/3  | 3/3 | 0/3                            | 0/3 | 3/3    | 3/3 | 3/3  | 3/3 | -     |
| Iprobenfos           | 3/3                          | 3/3 | 3/3    | 3/3 | 3/3  | 3/3 | 0/3                            | 0/3 | 3/3    | 3/3 | 3/3  | 3/3 | -     |

| Compound             | Detected per commodity (n=3) |     |        |     |      |     | Identified per commodity (n=3) |     |        |     |      |     | Blank |
|----------------------|------------------------------|-----|--------|-----|------|-----|--------------------------------|-----|--------|-----|------|-----|-------|
|                      | low                          |     | middle |     | high |     | low                            |     | middle |     | high |     |       |
|                      | CU                           | OR  | CU     | OR  | CU   | OR  | CU                             | OR  | CU     | OR  | CU   | OR  |       |
| Iprovalicarb         | 3/3                          | 3/3 | 3/3    | 3/3 | 3/3  | 3/3 | 0/3                            | 0/3 | 3/3    | 3/3 | 3/3  | 3/3 | -     |
| Isazofos             | 3/3                          | 3/3 | 3/3    | 3/3 | 3/3  | 3/3 | 3/3                            | 3/3 | 3/3    | 3/3 | 3/3  | 3/3 | -     |
| Isocarbamid          | 3/3                          | 3/3 | 3/3    | 3/3 | 3/3  | 3/3 | 0/3                            | 0/3 | 3/3    | 3/3 | 3/3  | 3/3 | -     |
| Isofenphos oxon      | 3/3                          | 3/3 | 3/3    | 3/3 | 3/3  | 3/3 | 0/3                            | 0/3 | 3/3    | 3/3 | 3/3  | 3/3 | -     |
| Isomethiozin         | 0/3                          | 0/3 | 3/3    | 3/3 | 3/3  | 3/3 | 0/3                            | 0/3 | 0/3    | 0/3 | 0/3  | 0/3 | -     |
| Isoprocarb           | 1/3                          | 2/3 | 3/3    | 3/3 | 3/3  | 3/3 | 0/3                            | 0/3 | 3/3    | 3/3 | 3/3  | 3/3 | -     |
| Isopropalin          | 0/3                          | 0/3 | 3/3    | 3/3 | 3/3  | 3/3 | 0/3                            | 0/3 | 0/3    | 0/3 | 1/3  | 0/3 | -     |
| Isoprothiolane       | 3/3                          | 3/3 | 3/3    | 3/3 | 3/3  | 3/3 | 3/3                            | 3/3 | 3/3    | 3/3 | 3/3  | 3/3 | -     |
| Isoproturon          | 3/3                          | 1/3 | 3/3    | 3/3 | 3/3  | 3/3 | 0/3                            | 0/3 | 3/3    | 3/3 | 3/3  | 3/3 | -     |
| Isouron              | 3/3                          | 3/3 | 3/3    | 3/3 | 3/3  | 3/3 | 3/3                            | 3/3 | 3/3    | 3/3 | 3/3  | 3/3 | -     |
| Isoxaben             | 3/3                          | 3/3 | 3/3    | 3/3 | 3/3  | 3/3 | 0/3                            | 0/3 | 3/3    | 3/3 | 3/3  | 3/3 | -     |
| Isoxadifen-ethyl     | 3/3                          | 0/3 | 3/3    | 3/3 | 3/3  | 3/3 | 0/3                            | 0/3 | 0/3    | 0/3 | 0/3  | 0/3 | -     |
| Isoxathion           | 3/3                          | 3/3 | 3/3    | 3/3 | 3/3  | 3/3 | 3/3                            | 3/3 | 3/3    | 3/3 | 3/3  | 3/3 | -     |
| Kadethrin            | 3/3                          | 0/3 | 3/3    | 3/3 | 3/3  | 3/3 | 0/3                            | 0/3 | 2/3    | 0/3 | 3/3  | 0/3 | -     |
| Karbutilate          | 3/3                          | 3/3 | 3/3    | 3/3 | 3/3  | 3/3 | 3/3                            | 3/3 | 3/3    | 3/3 | 3/3  | 3/3 | -     |
| Kresoxim-methyl      | 3/3                          | 1/3 | 3/3    | 3/3 | 3/3  | 3/3 | 0/3                            | 0/3 | 3/3    | 3/3 | 3/3  | 3/3 | -     |
| Lactofen             | 3/3                          | 0/3 | 3/3    | 3/3 | 3/3  | 3/3 | 0/3                            | 0/3 | 0/3    | 0/3 | 0/3  | 0/3 | -     |
| Linuron              | 3/3                          | 3/3 | 3/3    | 3/3 | 3/3  | 3/3 | 0/3                            | 0/3 | 3/3    | 3/3 | 3/3  | 3/3 | -     |
| Malaoxon             | 3/3                          | 3/3 | 3/3    | 3/3 | 3/3  | 3/3 | 0/3                            | 3/3 | 3/3    | 3/3 | 3/3  | 3/3 | -     |
| Malathion            | 3/3                          | 3/3 | 3/3    | 3/3 | 3/3  | 3/3 | 0/3                            | 0/3 | 0/3    | 0/3 | 0/3  | 0/3 | -     |
| Mecarbam             | 3/3                          | 3/3 | 3/3    | 3/3 | 3/3  | 3/3 | 0/3                            | 0/3 | 3/3    | 3/3 | 3/3  | 3/3 | -     |
| Mefenacet            | 3/3                          | 3/3 | 3/3    | 3/3 | 3/3  | 3/3 | 3/3                            | 3/3 | 3/3    | 3/3 | 3/3  | 3/3 | -     |
| Mepanipyrim          | 3/3                          | 3/3 | 3/3    | 3/3 | 3/3  | 3/3 | 0/3                            | 0/3 | 3/3    | 3/3 | 3/3  | 3/3 | -     |
| Mephosfolan          | 3/3                          | 3/3 | 3/3    | 3/3 | 3/3  | 3/3 | 0/3                            | 3/3 | 3/3    | 3/3 | 3/3  | 3/3 | -     |
| Mepiquat chloride    | 3/3                          | 1/3 | 3/3    | 3/3 | 3/3  | 3/3 | 0/3                            | 0/3 | 3/3    | 3/3 | 3/3  | 3/3 | -     |
| Mepronil             | 3/3                          | 3/3 | 3/3    | 3/3 | 3/3  | 3/3 | 3/3                            | 3/3 | 3/3    | 3/3 | 3/3  | 3/3 | -     |
| Mesosulfuron-methyl  | 0/3                          | 0/3 | 1/3    | 1/3 | 3/3  | 3/3 | 0/3                            | 0/3 | 0/3    | 0/3 | 0/3  | 0/3 | -     |
| Metalaxyl            | 3/3                          | 3/3 | 3/3    | 3/3 | 3/3  | 3/3 | 3/3                            | 3/3 | 3/3    | 3/3 | 3/3  | 3/3 | -     |
| Metamitron           | 3/3                          | 3/3 | 3/3    | 3/3 | 3/3  | 3/3 | 0/3                            | 0/3 | 0/3    | 0/3 | 3/3  | 0/3 | -     |
| Metazachlor          | 0/3                          | 3/3 | 3/3    | 3/3 | 3/3  | 3/3 | 0/3                            | 0/3 | 3/3    | 3/3 | 3/3  | 3/3 | -     |
| Metconazole          | 3/3                          | 3/3 | 3/3    | 3/3 | 3/3  | 3/3 | 0/3                            | 0/3 | 3/3    | 3/3 | 3/3  | 3/3 | -     |
| Methabenzthiazuron   | 3/3                          | 3/3 | 3/3    | 3/3 | 3/3  | 3/3 | 0/3                            | 3/3 | 3/3    | 3/3 | 3/3  | 3/3 | -     |
| Methamidophos        | 3/3                          | 0/3 | 3/3    | 3/3 | 3/3  | 3/3 | 0/3                            | 0/3 | 1/3    | 2/3 | 3/3  | 3/3 | -     |
| Methiocarb           | 3/3                          | 0/3 | 3/3    | 0/3 | 3/3  | 3/3 | 0/3                            | 0/3 | 0/3    | 0/3 | 3/3  | 3/3 | -     |
| Methiocarb sulfoxide | 3/3                          | 3/3 | 3/3    | 3/3 | 3/3  | 3/3 | 0/3                            | 3/3 | 3/3    | 3/3 | 3/3  | 3/3 | -     |
| Methomyl             | 0/3                          | 3/3 | 3/3    | 3/3 | 3/3  | 3/3 | 0/3                            | 0/3 | 3/3    | 1/3 | 3/3  | 3/3 | -     |
| Methoprotryne        | 3/3                          | 3/3 | 3/3    | 3/3 | 3/3  | 3/3 | 3/3                            | 3/3 | 3/3    | 3/3 | 3/3  | 3/3 | -     |
| Metobromuron         | 3/3                          | 3/3 | 3/3    | 3/3 | 3/3  | 3/3 | 0/3                            | 0/3 | 0/3    | 3/3 | 3/3  | 3/3 | -     |
| Metolachlor          | 3/3                          | 3/3 | 3/3    | 3/3 | 3/3  | 3/3 | 3/3                            | 3/3 | 3/3    | 3/3 | 3/3  | 3/3 | -     |
| Metoxuron            | 0/3                          | 0/3 | 0/3    | 0/3 | 0/3  | 0/3 | 0/3                            | 0/3 | 0/3    | 0/3 | 0/3  | 0/3 | -     |
| Metribuzin           | 0/3                          | 0/3 | 0/3    | 0/3 | 3/3  | 3/3 | 0/3                            | 0/3 | 0/3    | 0/3 | 3/3  | 3/3 | -     |

| Compound                       | Detected per commodity (n=3) |     |        |     |      |     | Identified per commodity (n=3) |     |        |     |      |     | Blank |
|--------------------------------|------------------------------|-----|--------|-----|------|-----|--------------------------------|-----|--------|-----|------|-----|-------|
|                                | low                          |     | middle |     | high |     | low                            |     | middle |     | high |     |       |
|                                | CU                           | OR  | CU     | OR  | CU   | OR  | CU                             | OR  | CU     | OR  | CU   | OR  |       |
| Mexacarbate                    | 0/3                          | 0/3 | 0/3    | 0/3 | 3/3  | 0/3 | 0/3                            | 0/3 | 0/3    | 0/3 | 3/3  | 0/3 | -     |
| Monocrotophos                  | 3/3                          | 3/3 | 3/3    | 3/3 | 3/3  | 3/3 | 3/3                            | 3/3 | 3/3    | 3/3 | 3/3  | 3/3 | -     |
| Monuron                        | 3/3                          | 3/3 | 3/3    | 3/3 | 3/3  | 3/3 | 0/3                            | 0/3 | 3/3    | 3/3 | 3/3  | 3/3 | -     |
| Myclobutanil                   | 3/3                          | 3/3 | 3/3    | 3/3 | 3/3  | 3/3 | 0/3                            | 0/3 | 3/3    | 3/3 | 3/3  | 3/3 | -     |
| Napropamide                    | 3/3                          | 3/3 | 3/3    | 3/3 | 3/3  | 3/3 | 3/3                            | 3/3 | 3/3    | 3/3 | 3/3  | 3/3 | -     |
| Neburon                        | 3/3                          | 3/3 | 3/3    | 3/3 | 3/3  | 3/3 | 0/3                            | 0/3 | 3/3    | 3/3 | 3/3  | 3/3 | -     |
| Norflurazon                    | 3/3                          | 3/3 | 3/3    | 3/3 | 3/3  | 3/3 | 0/3                            | 0/3 | 3/3    | 3/3 | 3/3  | 3/3 | -     |
| Nuarimol                       | 3/3                          | 3/3 | 3/3    | 3/3 | 3/3  | 3/3 | 0/3                            | 0/3 | 3/3    | 3/3 | 3/3  | 3/3 | -     |
| Octhilineone                   | 3/3                          | 3/3 | 3/3    | 3/3 | 3/3  | 3/3 | 3/3                            | 3/3 | 3/3    | 3/3 | 3/3  | 3/3 | -     |
| Ofurace                        | 3/3                          | 3/3 | 3/3    | 3/3 | 3/3  | 3/3 | 0/3                            | 3/3 | 3/3    | 3/3 | 3/3  | 3/3 | -     |
| Omethoate                      | 3/3                          | 3/3 | 3/3    | 3/3 | 3/3  | 3/3 | 0/3                            | 3/3 | 3/3    | 3/3 | 3/3  | 3/3 | -     |
| Orbencarb                      | 3/3                          | 3/3 | 3/3    | 3/3 | 3/3  | 3/3 | 3/3                            | 1/3 | 3/3    | 3/3 | 3/3  | 3/3 | -     |
| Oxadixyl                       | 3/3                          | 3/3 | 3/3    | 3/3 | 3/3  | 3/3 | 0/3                            | 0/3 | 3/3    | 3/3 | 3/3  | 3/3 | -     |
| Oxycarboxin                    | 3/3                          | 3/3 | 3/3    | 3/3 | 3/3  | 3/3 | 0/3                            | 3/3 | 3/3    | 3/3 | 3/3  | 3/3 | -     |
| Paclobutrazol                  | 3/3                          | 3/3 | 3/3    | 3/3 | 3/3  | 3/3 | 0/3                            | 3/3 | 3/3    | 3/3 | 3/3  | 3/3 | -     |
| Paraoxon-ethyl                 | 3/3                          | 2/3 | 3/3    | 3/3 | 3/3  | 3/3 | 0/3                            | 0/3 | 0/3    | 0/3 | 3/3  | 0/3 | -     |
| Pebulate                       | 1/3                          | 0/3 | 3/3    | 3/3 | 3/3  | 3/3 | 0/3                            | 0/3 | 3/3    | 3/3 | 3/3  | 3/3 | -     |
| Penconazole                    | 3/3                          | 3/3 | 3/3    | 3/3 | 3/3  | 3/3 | 0/3                            | 0/3 | 3/3    | 3/3 | 3/3  | 3/3 | -     |
| Pencycuron                     | 3/3                          | 1/3 | 3/3    | 3/3 | 3/3  | 3/3 | 0/3                            | 0/3 | 3/3    | 3/3 | 3/3  | 3/3 | -     |
| Pentanochlor                   | 3/3                          | 0/3 | 3/3    | 3/3 | 3/3  | 3/3 | 0/3                            | 0/3 | 3/3    | 3/3 | 3/3  | 3/3 | -     |
| Phenmedipham                   | 3/3                          | 2/3 | 3/3    | 3/3 | 3/3  | 3/3 | 0/3                            | 0/3 | 3/3    | 3/3 | 3/3  | 3/3 | -     |
| Phenthoate                     | 3/3                          | 3/3 | 3/3    | 3/3 | 3/3  | 3/3 | 0/3                            | 0/3 | 3/3    | 3/3 | 3/3  | 3/3 | -     |
| Phorate sulfone                | 3/3                          | 3/3 | 3/3    | 3/3 | 3/3  | 3/3 | 0/3                            | 0/3 | 0/3    | 0/3 | 3/3  | 3/3 | -     |
| Phorate sulfoxide              | 3/3                          | 3/3 | 3/3    | 3/3 | 3/3  | 3/3 | 3/3                            | 3/3 | 3/3    | 3/3 | 3/3  | 3/3 | -     |
| Phosalone                      | 3/3                          | 0/3 | 3/3    | 3/3 | 3/3  | 3/3 | 0/3                            | 0/3 | 0/3    | 0/3 | 0/3  | 0/3 | -     |
| Phosphamidon                   | 3/3                          | 3/3 | 3/3    | 3/3 | 3/3  | 3/3 | 0/3                            | 3/3 | 3/3    | 3/3 | 3/3  | 3/3 | -     |
| Phoxim                         | 2/3                          | 0/3 | 3/3    | 3/3 | 3/3  | 3/3 | 0/3                            | 0/3 | 0/3    | 0/3 | 0/3  | 0/3 | -     |
| Picolinafen                    | 3/3                          | 0/3 | 3/3    | 3/3 | 3/3  | 3/3 | 0/3                            | 0/3 | 0/3    | 0/3 | 0/3  | 0/3 | -     |
| Picoxystrobin                  | 3/3                          | 2/3 | 3/3    | 3/3 | 3/3  | 3/3 | 0/3                            | 0/3 | 0/3    | 0/3 | 3/3  | 3/3 | -     |
| Piperonyl-butoxide             | 3/3                          | 3/3 | 3/3    | 3/3 | 3/3  | 3/3 | 0/3                            | 0/3 | 3/3    | 3/3 | 3/3  | 3/3 | -     |
| Piperophos                     | 3/3                          | 3/3 | 3/3    | 3/3 | 3/3  | 3/3 | 3/3                            | 3/3 | 3/3    | 3/3 | 3/3  | 3/3 | -     |
| Pirimicarb-desmethyl-formamido | 3/3                          | 3/3 | 3/3    | 3/3 | 3/3  | 3/3 | 0/3                            | 3/3 | 3/3    | 3/3 | 3/3  | 3/3 | -     |
| Pirimiphos-ethyl               | 3/3                          | 3/3 | 3/3    | 3/3 | 3/3  | 3/3 | 3/3                            | 3/3 | 3/3    | 3/3 | 3/3  | 3/3 | -     |
| Pirimiphos-methyl              | 3/3                          | 3/3 | 3/3    | 3/3 | 3/3  | 3/3 | 0/3                            | 3/3 | 3/3    | 3/3 | 3/3  | 3/3 | -     |
| Pretilachlor                   | 1/3                          | 0/3 | 3/3    | 3/3 | 3/3  | 3/3 | 0/3                            | 0/3 | 3/3    | 3/3 | 3/3  | 3/3 | -     |
| Prochloraz                     | 0/0                          | 2/2 | 0/0    | 2/2 | 0/0  | 2/2 | 0/0                            | 2/2 | 0/0    | 2/2 | 0/0  | 2/2 | 4     |
| Profenofos                     | 3/3                          | 0/3 | 3/3    | 3/3 | 3/3  | 3/3 | 0/3                            | 0/3 | 0/3    | 0/3 | 0/3  | 0/3 | -     |
| Prometon                       | 3/3                          | 3/3 | 3/3    | 3/3 | 3/3  | 3/3 | 0/3                            | 3/3 | 3/3    | 3/3 | 3/3  | 3/3 | -     |
| Prometryn                      | 3/3                          | 3/3 | 3/3    | 3/3 | 3/3  | 3/3 | 3/3                            | 3/3 | 3/3    | 3/3 | 3/3  | 3/3 | -     |
| Pronamide                      | 3/3                          | 3/3 | 3/3    | 3/3 | 3/3  | 3/3 | 0/3                            | 0/3 | 3/3    | 3/3 | 3/3  | 3/3 | -     |
| Propamocarb                    | 2/2                          | 2/3 | 2/2    | 3/3 | 2/2  | 3/3 | 2/2                            | 2/3 | 2/2    | 3/3 | 2/2  | 3/3 | 1     |



| Compound            | Detected per commodity (n=3) |     |        |     |      |     | Identified per commodity (n=3) |     |        |     |      |     | Blank |
|---------------------|------------------------------|-----|--------|-----|------|-----|--------------------------------|-----|--------|-----|------|-----|-------|
|                     | low                          |     | middle |     | high |     | low                            |     | middle |     | high |     |       |
|                     | CU                           | OR  | CU     | OR  | CU   | OR  | CU                             | OR  | CU     | OR  | CU   | OR  |       |
| Temephos            | 3/3                          | 0/3 | 3/3    | 3/3 | 3/3  | 3/3 | 0/3                            | 0/3 | 0/3    | 0/3 | 0/3  | 0/3 | -     |
| Terbucarb           | 0/3                          | 0/3 | 3/3    | 3/3 | 3/3  | 3/3 | 0/3                            | 0/3 | 3/3    | 3/3 | 3/3  | 3/3 | -     |
| Terbuthylazine      | 3/3                          | 3/3 | 3/3    | 3/3 | 3/3  | 3/3 | 0/3                            | 3/3 | 3/3    | 3/3 | 3/3  | 3/3 | -     |
| Terbutryne          | 3/3                          | 3/3 | 3/3    | 3/3 | 3/3  | 3/3 | 3/3                            | 3/3 | 3/3    | 3/3 | 3/3  | 3/3 | -     |
| Tetrachlorvinphos   | 1/3                          | 0/3 | 3/3    | 3/3 | 3/3  | 3/3 | 0/3                            | 0/3 | 0/3    | 3/3 | 3/3  | 3/3 | -     |
| Tetraconazole       | 3/3                          | 3/3 | 3/3    | 3/3 | 3/3  | 3/3 | 0/3                            | 0/3 | 3/3    | 3/3 | 3/3  | 3/3 | -     |
| Tetramethrin        | 0/3                          | 0/3 | 3/3    | 3/3 | 3/3  | 3/3 | 0/3                            | 0/3 | 0/3    | 0/3 | 0/3  | 0/3 | -     |
| Thiacloprid         | 3/3                          | 3/3 | 3/3    | 3/3 | 3/3  | 3/3 | 0/3                            | 0/3 | 3/3    | 3/3 | 3/3  | 3/3 | -     |
| Thiamethoxam        | 3/3                          | 3/3 | 3/3    | 3/3 | 3/3  | 3/3 | 3/3                            | 3/3 | 3/3    | 3/3 | 3/3  | 3/3 | -     |
| Thiazafluron        | 3/3                          | 3/3 | 3/3    | 3/3 | 3/3  | 3/3 | 0/3                            | 0/3 | 3/3    | 3/3 | 3/3  | 3/3 | -     |
| Thiazopyr           | 3/3                          | 2/3 | 3/3    | 3/3 | 3/3  | 3/3 | 0/3                            | 0/3 | 3/3    | 3/3 | 3/3  | 3/3 | -     |
| Thiobencarb         | 3/3                          | 2/3 | 3/3    | 3/3 | 3/3  | 3/3 | 0/3                            | 0/3 | 3/3    | 3/3 | 3/3  | 3/3 | -     |
| Thiofanox sulfone   | 0/3                          | 0/3 | 3/3    | 3/3 | 3/3  | 3/3 | 0/3                            | 0/3 | 3/3    | 3/3 | 3/3  | 3/3 | -     |
| Thiofanox sulfoxide | 0/3                          | 3/3 | 3/3    | 3/3 | 3/3  | 3/3 | 0/3                            | 0/3 | 3/3    | 1/3 | 3/3  | 3/3 | -     |
| Thionazin           | 3/3                          | 3/3 | 3/3    | 3/3 | 3/3  | 3/3 | 0/3                            | 0/3 | 3/3    | 3/3 | 3/3  | 3/3 | -     |
| Thiophanate-methyl  | 3/3                          | 3/3 | 3/3    | 3/3 | 3/3  | 3/3 | 3/3                            | 3/3 | 3/3    | 3/3 | 3/3  | 3/3 | -     |
| Tiencarbazil        | 3/3                          | 2/3 | 3/3    | 3/3 | 3/3  | 3/3 | 0/3                            | 0/3 | 3/3    | 3/3 | 3/3  | 3/3 | -     |
| Tolfenpyrad         | 3/3                          | 0/3 | 3/3    | 3/3 | 3/3  | 3/3 | 0/3                            | 0/3 | 3/3    | 3/3 | 3/3  | 3/3 | -     |
| Tralkoxydim         | 0/3                          | 0/3 | 3/3    | 3/3 | 3/3  | 3/3 | 0/3                            | 0/3 | 0/3    | 0/3 | 0/3  | 0/3 | -     |
| Triadimefon         | 3/3                          | 3/3 | 3/3    | 3/3 | 3/3  | 3/3 | 0/3                            | 0/3 | 3/3    | 3/3 | 3/3  | 3/3 | -     |
| Triadimenol         | 0/3                          | 0/3 | 3/3    | 0/3 | 3/3  | 3/3 | 0/3                            | 0/3 | 0/3    | 0/3 | 3/3  | 3/3 | -     |
| Triapenthenol       | 3/3                          | 3/3 | 3/3    | 3/3 | 3/3  | 3/3 | 3/3                            | 3/3 | 3/3    | 3/3 | 3/3  | 3/3 | -     |
| Triazophos          | 3/3                          | 3/3 | 3/3    | 3/3 | 3/3  | 3/3 | 3/3                            | 0/3 | 3/3    | 3/3 | 3/3  | 3/3 | -     |
| Tribufos            | 3/3                          | 3/3 | 3/3    | 3/3 | 3/3  | 3/3 | 0/3                            | 0/3 | 3/3    | 3/3 | 3/3  | 3/3 | -     |
| Trichlorfon         | 3/3                          | 3/3 | 3/3    | 3/3 | 3/3  | 3/3 | 0/3                            | 0/3 | 0/3    | 1/3 | 3/3  | 3/3 | -     |
| Tricyclazole        | 3/3                          | 3/3 | 3/3    | 3/3 | 3/3  | 3/3 | 3/3                            | 3/3 | 3/3    | 3/3 | 3/3  | 3/3 | -     |
| Trietazine          | 3/3                          | 3/3 | 3/3    | 3/3 | 3/3  | 3/3 | 1/3                            | 3/3 | 3/3    | 3/3 | 3/3  | 3/3 | -     |
| Trifloxystrobin     | 3/3                          | 3/3 | 3/3    | 3/3 | 3/3  | 3/3 | 0/3                            | 3/3 | 3/3    | 3/3 | 3/3  | 3/3 | -     |
| Triflumizole        | 3/3                          | 3/3 | 3/3    | 3/3 | 3/3  | 3/3 | 0/3                            | 1/3 | 3/3    | 3/3 | 3/3  | 3/3 | -     |
| Triflumuron         | 0/3                          | 2/3 | 3/3    | 3/3 | 3/3  | 3/3 | 0/3                            | 0/3 | 0/3    | 3/3 | 3/3  | 3/3 | -     |
| Triticonazole       | 0/3                          | 0/3 | 0/3    | 0/3 | 3/3  | 3/3 | 0/3                            | 0/3 | 0/3    | 0/3 | 3/3  | 3/3 | -     |
| Vamidothion         | 3/3                          | 3/3 | 3/3    | 3/3 | 3/3  | 3/3 | 3/3                            | 3/3 | 3/3    | 3/3 | 3/3  | 3/3 | -     |
| Zoxamide            | 3/3                          | 1/3 | 3/3    | 3/3 | 3/3  | 3/3 | 0/3                            | 0/3 | 3/3    | 3/3 | 3/3  | 3/3 | -     |
