# Supplementary material for: Screening and identification strategy for 317 pesticides in fruits and vegetables by liquid chromatography-quadrupole time-of-flight high resolution mass spectrometry
Source: Royal Society of Chemistry journal article supplement (doi:10.1039/c5ay01478f), 2015-01-01
Supplement: c5ay01478f2.pdf [file c5ay01478f2.pdf]

**Table S1** Validation results of six spiked samples at three concentration levels and corresponding screening limit (SDL) and limit of identification (LOI).

| Compound             | Spiked Levels ( $\mu\text{g kg}^{-1}$ ) |        |      | Detected (n=6) |        |      | Identified (n=6) |        |      | Blank | SDL<br>$\mu\text{g kg}^{-1}$ | LOI<br>$\mu\text{g kg}^{-1}$ |
|----------------------|-----------------------------------------|--------|------|----------------|--------|------|------------------|--------|------|-------|------------------------------|------------------------------|
|                      | Low                                     | Middle | High | Low            | Middle | High | Low              | Middle | High |       |                              |                              |
| 1,3-Diphenyl urea    | 4.40                                    | 44.0   | 220  | 6/6            | 6/6    | 6/6  | 6/6              | 6/6    | 6/6  | -     | 4.40                         | 4.40                         |
| 1-naphthyl acetamide | 1.00                                    | 10.0   | 50.0 | 6/6            | 6/6    | 6/6  | 6/6              | 6/6    | 6/6  | -     | 1.00                         | 1.00                         |
| 3,4,5-Trimethacarb   | 1.00                                    | 10.0   | 50.0 | 0/6            | 6/6    | 6/6  | 0/6              | 6/6    | 6/6  | -     | 10.0                         | 10.0                         |
| Acetamiprid          | 1.00                                    | 10.0   | 50.0 | 5/5            | 5/5    | 5/5  | 0/5              | 5/5    | 5/5  | 1     | 1.00                         | 10.0                         |
| Acetochlor           | 1.00                                    | 10.0   | 50.0 | 0/6            | 6/6    | 6/6  | 0/6              | 6/6    | 6/6  | -     | 10.0                         | 10.0                         |
| Aldicarb             | 4.00                                    | 40.0   | 200  | 2/6            | 6/6    | 6/6  | 0/6              | 0/6    | 0/6  | -     | 40.0                         | -                            |
| Ametryn              | 1.00                                    | 10.0   | 50.0 | 6/6            | 6/6    | 6/6  | 6/6              | 6/6    | 6/6  | -     | 1.00                         | 1.00                         |
| Ancymidol            | 1.00                                    | 10.0   | 50.0 | 6/6            | 6/6    | 6/6  | 3/6              | 6/6    | 6/6  | -     | 1.00                         | 10.0                         |
| Anilofos             | 1.00                                    | 10.0   | 50.0 | 6/6            | 6/6    | 6/6  | 3/6              | 6/6    | 6/6  | -     | 1.00                         | 10.0                         |
| Aspon                | 2.00                                    | 20.0   | 100  | 3/6            | 6/6    | 6/6  | 0/6              | 6/6    | 6/6  | -     | 20.0                         | 20.0                         |
| Atraton              | 4.00                                    | 40.0   | 200  | 6/6            | 6/6    | 6/6  | 6/6              | 6/6    | 6/6  | -     | 4.00                         | 4.00                         |
| Atrazine             | 1.00                                    | 10.0   | 50.0 | 5/6            | 6/6    | 6/6  | 0/6              | 6/6    | 6/6  | -     | 10.0                         | 10.0                         |
| Atrazine-Desethyl    | 4.00                                    | 40.0   | 200  | 6/6            | 6/6    | 6/6  | 3/6              | 6/6    | 6/6  | -     | 4.00                         | 40.0                         |
| Azamethiphos         | 1.00                                    | 10.0   | 50.0 | 6/6            | 6/6    | 6/6  | 3/6              | 6/6    | 6/6  | -     | 1.00                         | 10.0                         |
| Azinphos-ethyl       | 1.00                                    | 10.0   | 50.0 | 6/6            | 6/6    | 6/6  | 6/6              | 6/6    | 6/6  | -     | 1.00                         | 1.00                         |
| Azinphos-methyl      | 6.70                                    | 67.0   | 335  | 6/6            | 6/6    | 6/6  | 0/6              | 0/6    | 0/6  | -     | 6.70                         | -                            |
| Azoxystrobin         | 1.00                                    | 10.0   | 50.0 | 5/5            | 5/5    | 5/5  | 5/5              | 5/5    | 5/5  | 1     | 1.00                         | 1.00                         |
| Benalaxyl            | 1.00                                    | 10.0   | 50.0 | 6/6            | 6/6    | 6/6  | 6/6              | 6/6    | 6/6  | -     | 1.00                         | 1.00                         |
| Bendiocarb           | 2.00                                    | 20.0   | 100  | 1/6            | 6/6    | 6/6  | 0/6              | 3/6    | 6/6  | -     | 20.0                         | 100                          |
| Benodanil            | 1.00                                    | 10.0   | 50.0 | 6/6            | 6/6    | 6/6  | 0/6              | 6/6    | 6/6  | -     | 1.00                         | 10.0                         |
| Benoxacor            | 10.00                                   | 100    | 500  | 6/6            | 6/6    | 6/6  | 0/6              | 6/6    | 6/6  | -     | 10.0                         | 100                          |
| Bensulide            | 1.00                                    | 10.0   | 50.0 | 6/6            | 6/6    | 6/6  | 3/6              | 6/6    | 6/6  | -     | 1.00                         | 10.0                         |
| Benzoximate          | 1.00                                    | 10.0   | 50.0 | 2/6            | 6/6    | 6/6  | 0/6              | 6/6    | 6/6  | -     | 10.0                         | 10.0                         |
| Benzoylprop-ethyl    | 1.00                                    | 10.0   | 50.0 | 0/6            | 0/6    | 0/6  | 0/6              | 0/6    | 0/6  | -     | -                            | -                            |
| Bioallethrin         | 8.00                                    | 80.0   | 400  | 0/6            | 4/6    | 6/6  | 0/6              | 0/6    | 0/6  | -     | 400                          | -                            |
| Bitertanol           | 1.00                                    | 10.0   | 50.0 | 2/6            | 3/6    | 6/6  | 0/6              | 0/6    | 6/6  | -     | 50.0                         | 50.0                         |
| Bromacil             | 4.90                                    | 49.0   | 245  | 6/6            | 6/6    | 6/6  | 3/6              | 6/6    | 6/6  | -     | 4.90                         | 49.0                         |
| Bromfeninfos         | 1.00                                    | 10.0   | 50.0 | 6/6            | 6/6    | 6/6  | 6/6              | 6/6    | 6/6  | -     | 1.00                         | 1.00                         |
| Brompyrazon          | 2.00                                    | 20.0   | 100  | 6/6            | 6/6    | 6/6  | 3/6              | 6/6    | 6/6  | -     | 2.00                         | 20.0                         |
| Bromuconazole        | 1.00                                    | 10.0   | 50.0 | 6/6            | 6/6    | 6/6  | 0/6              | 6/6    | 6/6  | -     | 1.00                         | 10.0                         |
| Bupirimate           | 2.00                                    | 20.0   | 100  | 6/6            | 6/6    | 6/6  | 6/6              | 6/6    | 6/6  | -     | 2.00                         | 2.00                         |
| Buprofezin           | 1.00                                    | 10.0   | 50.0 | 5/5            | 5/5    | 5/5  | 5/5              | 5/5    | 5/5  | 1     | 1.00                         | 1.00                         |
| Butachlor            | 4.60                                    | 46.0   | 230  | 0/6            | 6/6    | 6/6  | 0/6              | 6/6    | 6/6  | -     | 46.0                         | 46.0                         |
| Butafenacil          | 1.00                                    | 10.0   | 50.0 | 6/6            | 6/6    | 6/6  | 6/6              | 6/6    | 6/6  | -     | 1.00                         | 1.00                         |
| Butamifos            | 1.00                                    | 10.0   | 50.0 | 5/6            | 6/6    | 6/6  | 0/6              | 6/6    | 6/6  | -     | 10.0                         | 10.0                         |
| Butralin             | 1.00                                    | 10.0   | 50.0 | 3/6            | 6/6    | 6/6  | 0/6              | 6/6    | 6/6  | -     | 10.0                         | 10.0                         |
| Cadusafos            | 1.00                                    | 10.0   | 50.0 | 6/6            | 6/6    | 6/6  | 6/6              | 6/6    | 6/6  | -     | 1.00                         | 1.00                         |
| Cafenstrole          | 1.00                                    | 10.0   | 50.0 | 6/6            | 6/6    | 6/6  | 0/6              | 6/6    | 6/6  | -     | 1.00                         | 10.0                         |
| Carbaryl             | 2.70                                    | 27.0   | 135  | 5/6            | 6/6    | 6/6  | 0/6              | 6/6    | 6/6  | -     | 27.0                         | 27.0                         |
| Carbendazim          | 1.00                                    | 10.0   | 50.0 | 4/4            | 4/4    | 4/4  | 4/4              | 4/4    | 4/4  | 2     | 1.00                         | 1.00                         |

| Compound                 | Spiked Levels ( $\mu\text{g kg}^{-1}$ ) |        |      | Detected (n=6) |        |      | Identified (n=6) |        |      | Blank | SDL<br>$\mu\text{g kg}^{-1}$ | LOI<br>$\mu\text{g kg}^{-1}$ |
|--------------------------|-----------------------------------------|--------|------|----------------|--------|------|------------------|--------|------|-------|------------------------------|------------------------------|
|                          | Low                                     | Middle | High | Low            | Middle | High | Low              | Middle | High |       |                              |                              |
| Carbetamide              | 1.00                                    | 10.0   | 50.0 | 3/6            | 6/6    | 6/6  | 0/6              | 6/6    | 6/6  | -     | 10.0                         | 10.0                         |
| Carbofuran               | 1.00                                    | 10.0   | 50.0 | 6/6            | 6/6    | 6/6  | 0/6              | 6/6    | 6/6  | -     | 1.00                         | 10.0                         |
| Carbofuran-3-hydroxy     | 1.40                                    | 14.0   | 70.0 | 6/6            | 6/6    | 6/6  | 3/6              | 6/6    | 6/6  | -     | 1.40                         | 14.0                         |
| Carbophenothion          | 2.00                                    | 20.0   | 100  | 0/6            | 0/6    | 3/6  | 0/6              | 0/6    | 0/6  | -     | -                            | -                            |
| Carboxin                 | 1.00                                    | 10.0   | 50.0 | 6/6            | 6/6    | 6/6  | 0/6              | 6/6    | 6/6  | -     | 1.00                         | 10.0                         |
| Carfentrazone-ethyl      | 4.00                                    | 40.0   | 200  | 6/6            | 6/6    | 6/6  | 0/6              | 6/6    | 6/6  | -     | 4.00                         | 40.0                         |
| Carpropamid              | 1.00                                    | 10.0   | 50.0 | 3/6            | 6/6    | 6/6  | 0/6              | 3/6    | 6/6  | -     | 10.0                         | 50.0                         |
| Chlorfenvinphos          | 1.00                                    | 10.0   | 50.0 | 5/6            | 6/6    | 6/6  | 0/6              | 6/6    | 6/6  | -     | 10.0                         | 10.0                         |
| Chloridazon              | 1.00                                    | 10.0   | 50.0 | 6/6            | 6/6    | 6/6  | 1/6              | 6/6    | 6/6  | -     | 1.00                         | 10.0                         |
| Chlorotoluron            | 2.00                                    | 20.0   | 100  | 6/6            | 6/6    | 6/6  | 3/6              | 6/6    | 6/6  | -     | 2.00                         | 20.0                         |
| Chloroxuron              | 1.00                                    | 10.0   | 50.0 | 6/6            | 6/6    | 6/6  | 3/6              | 6/6    | 6/6  | -     | 1.00                         | 10.0                         |
| Chlorpyrifos-ethyl       | 2.00                                    | 20.0   | 100  | 6/6            | 6/6    | 6/6  | 3/6              | 6/6    | 6/6  | -     | 2.00                         | 20.0                         |
| Chlorthiophos            | 6.00                                    | 60.0   | 300  | 3/6            | 6/6    | 6/6  | 0/6              | 0/6    | 6/6  | -     | 60.0                         | 300                          |
| Chromafenozide           | 1.00                                    | 10.0   | 50.0 | 6/6            | 6/6    | 6/6  | 6/6              | 6/6    | 6/6  | -     | 1.00                         | 1.00                         |
| Cinmethylin              | 1.00                                    | 10.0   | 50.0 | 1/6            | 6/6    | 6/6  | 0/6              | 3/6    | 6/6  | -     | 10.0                         | 50.0                         |
| Clomazone                | 1.00                                    | 10.0   | 50.0 | 5/6            | 6/6    | 6/6  | 3/6              | 6/6    | 6/6  | -     | 10.0                         | 10.0                         |
| Cloquintocet-mexyl       | 1.00                                    | 10.0   | 50.0 | 3/6            | 6/6    | 6/6  | 0/6              | 6/6    | 6/6  | -     | 10.0                         | 10.0                         |
| Clothianidin             | 1.00                                    | 10.0   | 50.0 | 6/6            | 6/6    | 6/6  | 1/6              | 6/6    | 6/6  | -     | 1.00                         | 10.0                         |
| Crufomate                | 2.00                                    | 20.0   | 100  | 1/6            | 6/6    | 6/6  | 0/6              | 0/6    | 0/6  | -     | 20.0                         | -                            |
| Cyanazine                | 1.00                                    | 10.0   | 50.0 | 6/6            | 6/6    | 6/6  | 0/6              | 6/6    | 6/6  | -     | 1.00                         | 10.0                         |
| Cycloate                 | 4.00                                    | 40.0   | 200  | 3/6            | 6/6    | 6/6  | 0/6              | 6/6    | 6/6  | -     | 40.0                         | 40.0                         |
| Cycluron                 | 1.00                                    | 10.0   | 50.0 | 4/6            | 6/6    | 6/6  | 0/6              | 6/6    | 6/6  | -     | 10.0                         | 10.0                         |
| Cyflufenamid             | 1.00                                    | 10.0   | 50.0 | 6/6            | 6/6    | 6/6  | 3/6              | 6/6    | 6/6  | -     | 1.00                         | 10.0                         |
| Cyprazine                | 1.00                                    | 10.0   | 50.0 | 6/6            | 6/6    | 6/6  | 0/6              | 6/6    | 6/6  | -     | 1.00                         | 10.0                         |
| Cyproconazole            | 3.00                                    | 30.0   | 150  | 0/6            | 6/6    | 6/6  | 0/6              | 6/6    | 6/6  | -     | 30.0                         | 30.0                         |
| Cyprodinil               | 3.70                                    | 37.0   | 185  | 0/6            | 6/6    | 6/6  | 0/6              | 6/6    | 6/6  | -     | 37.0                         | 37.0                         |
| Demeton-S                | 1.00                                    | 10.0   | 50.0 | 4/6            | 6/6    | 6/6  | 0/6              | 6/6    | 6/6  | -     | 10.0                         | 10.0                         |
| Demeton-S sulfoxide      | 4.70                                    | 47.0   | 235  | 6/6            | 6/6    | 6/6  | 6/6              | 6/6    | 6/6  | -     | 4.70                         | 4.70                         |
| Demeton-S-methyl         | 8.00                                    | 80.0   | 400  | 0/6            | 6/6    | 6/6  | 0/6              | 0/6    | 0/6  | -     | 80.0                         | -                            |
| Demeton-S-methyl sulfone | 1.00                                    | 10.0   | 50.0 | 1/6            | 6/6    | 6/6  | 0/6              | 4/6    | 6/6  | -     | 10.0                         | 50.0                         |
| Desethyl-sebuthylazine   | 1.00                                    | 10.0   | 50.0 | 6/6            | 6/6    | 6/6  | 3/6              | 6/6    | 6/6  | -     | 1.00                         | 10.0                         |
| Desmedipham              | 1.00                                    | 10.0   | 50.0 | 0/6            | 6/6    | 6/6  | 0/6              | 6/6    | 6/6  | -     | 10.0                         | 10.0                         |
| Desmethyl-pirimicarb     | 1.00                                    | 10.0   | 50.0 | 5/6            | 6/6    | 6/6  | 0/6              | 6/6    | 6/6  | -     | 10.0                         | 10.0                         |
| Diallate                 | 1.00                                    | 10.0   | 50.0 | 6/6            | 6/6    | 6/6  | 0/6              | 6/6    | 6/6  | -     | 1.00                         | 10.0                         |
| Diazinon                 | 1.00                                    | 10.0   | 50.0 | 6/6            | 6/6    | 6/6  | 3/6              | 6/6    | 6/6  | -     | 1.00                         | 10.0                         |
| Dichlofenthion           | 6.00                                    | 60.0   | 300  | 2/6            | 6/6    | 6/6  | 0/6              | 0/6    | 0/6  | -     | 60.0                         | -                            |
| Diclobutrazole           | 1.00                                    | 10.0   | 50.0 | 6/6            | 6/6    | 6/6  | 3/6              | 6/6    | 6/6  | -     | 1.00                         | 10.0                         |
| Dicrotophos              | 1.00                                    | 10.0   | 50.0 | 6/6            | 6/6    | 6/6  | 3/6              | 6/6    | 6/6  | -     | 1.00                         | 10.0                         |
| Diethatyl-ethyl          | 1.00                                    | 10.0   | 50.0 | 6/6            | 6/6    | 6/6  | 0/6              | 6/6    | 6/6  | -     | 1.00                         | 10.0                         |
| Diethofencarb            | 1.00                                    | 10.0   | 50.0 | 3/6            | 3/6    | 6/6  | 0/6              | 0/6    | 6/6  | -     | 50.0                         | 50.0                         |
| Diethyltoluamide         | 1.00                                    | 10.0   | 50.0 | 6/6            | 6/6    | 6/6  | 6/6              | 6/6    | 6/6  | -     | 1.00                         | 1.00                         |
| Difenoconazole           | 1.00                                    | 10.0   | 50.0 | 4/4            | 4/4    | 4/4  | 0/4              | 4/4    | 4/4  | 2     | 1.00                         | 10.0                         |
| Difenoaxuron             | 1.00                                    | 10.0   | 50.0 | 6/6            | 6/6    | 6/6  | 6/6              | 6/6    | 6/6  | -     | 1.00                         | 1.00                         |

| Compound             | Spiked Levels ( $\mu\text{g kg}^{-1}$ ) |        |      | Detected (n=6) |        |      | Identified (n=6) |        |      | Blank | SDL<br>$\mu\text{g kg}^{-1}$ | LOI<br>$\mu\text{g kg}^{-1}$ |
|----------------------|-----------------------------------------|--------|------|----------------|--------|------|------------------|--------|------|-------|------------------------------|------------------------------|
|                      | Low                                     | Middle | High | Low            | Middle | High | Low              | Middle | High |       |                              |                              |
| Dimefuron            | 1.00                                    | 10.0   | 50.0 | 6/6            | 6/6    | 6/6  | 0/6              | 6/6    | 6/6  | -     | 1.00                         | 10.0                         |
| Dimepiperate         | 1.00                                    | 10.0   | 50.0 | 0/6            | 6/6    | 6/6  | 0/6              | 6/6    | 6/6  | -     | 10.0                         | 10.0                         |
| Dimethachlor         | 1.00                                    | 10.0   | 50.0 | 3/6            | 6/6    | 6/6  | 0/6              | 6/6    | 6/6  | -     | 10.0                         | 10.0                         |
| Dimethametryn        | 1.00                                    | 10.0   | 50.0 | 3/6            | 6/6    | 6/6  | 0/6              | 6/6    | 6/6  | -     | 10.0                         | 10.0                         |
| Dimethenamid         | 1.00                                    | 10.0   | 50.0 | 6/6            | 6/6    | 6/6  | 6/6              | 6/6    | 6/6  | -     | 1.00                         | 1.00                         |
| Dimethirimol         | 1.00                                    | 10.0   | 50.0 | 6/6            | 6/6    | 6/6  | 3/6              | 6/6    | 6/6  | -     | 1.00                         | 10.0                         |
| Dimethoate           | 2.00                                    | 20.0   | 100  | 6/6            | 6/6    | 6/6  | 3/6              | 6/6    | 6/6  | -     | 2.00                         | 20.0                         |
| Dimethomorph         | 1.00                                    | 10.0   | 50.0 | 2/4            | 4/4    | 4/4  | 0/4              | 4/4    | 4/4  | 2     | 10.0                         | 10.0                         |
| Diniconazole         | 1.00                                    | 10.0   | 50.0 | 6/6            | 6/6    | 6/6  | 6/6              | 6/6    | 6/6  | -     | 1.00                         | 1.00                         |
| Diphenamid           | 1.00                                    | 10.0   | 50.0 | 3/6            | 6/6    | 6/6  | 0/6              | 6/6    | 6/6  | -     | 10.0                         | 10.0                         |
| Dipropetryn          | 6.20                                    | 62.0   | 310  | 6/6            | 6/6    | 6/6  | 6/6              | 6/6    | 6/6  | -     | 6.20                         | 6.20                         |
| Disulfoton sulfone   | 1.00                                    | 10.0   | 50.0 | 6/6            | 6/6    | 6/6  | 0/6              | 3/6    | 6/6  | -     | 1.00                         | 50.0                         |
| Disulfoton sulfoxide | 1.00                                    | 10.0   | 50.0 | 6/6            | 6/6    | 6/6  | 0/6              | 6/6    | 6/6  | -     | 1.00                         | 10.0                         |
| Dithiopyr            | 7.50                                    | 75.0   | 375  | 5/6            | 6/6    | 6/6  | 0/6              | 6/6    | 6/6  | -     | 75.0                         | 75.0                         |
| Diuron               | 4.00                                    | 40.0   | 200  | 6/6            | 6/6    | 6/6  | 2/6              | 6/6    | 6/6  | -     | 4.00                         | 40.0                         |
| Dodemorph            | 1.00                                    | 10.0   | 50.0 | 4/6            | 6/6    | 6/6  | 0/6              | 6/6    | 6/6  | -     | 10.0                         | 10.0                         |
| Edifenphos           | 1.00                                    | 10.0   | 50.0 | 6/6            | 6/6    | 6/6  | 0/6              | 6/6    | 6/6  | -     | 1.00                         | 10.0                         |
| Emamectin-benzoate   | 1.00                                    | 10.0   | 50.0 | 6/6            | 6/6    | 6/6  | 6/6              | 6/6    | 6/6  | -     | 1.00                         | 1.00                         |
| Epoxiconazole        | 1.00                                    | 10.0   | 50.0 | 6/6            | 6/6    | 6/6  | 4/6              | 6/6    | 6/6  | -     | 1.00                         | 10.0                         |
| Esprocarb            | 4.00                                    | 40.0   | 200  | 5/6            | 6/6    | 6/6  | 0/6              | 6/6    | 6/6  | -     | 40.0                         | 40.0                         |
| Etaconazole          | 5.20                                    | 52.0   | 260  | 0/6            | 5/6    | 6/6  | 0/6              | 0/6    | 6/6  | -     | 260                          | 260                          |
| Ethidimuron          | 1.00                                    | 10.0   | 50.0 | 6/6            | 6/6    | 6/6  | 3/6              | 6/6    | 6/6  | -     | 1.00                         | 10.0                         |
| Ethiofencarb sulfone | 1.00                                    | 10.0   | 50.0 | 6/6            | 6/6    | 6/6  | 0/6              | 6/6    | 6/6  | -     | 1.00                         | 10.0                         |
| Ethion               | 1.00                                    | 10.0   | 50.0 | 3/6            | 6/6    | 6/6  | 0/6              | 0/6    | 6/6  | -     | 10.0                         | 50.0                         |
| Ethiprole            | 2.00                                    | 20.0   | 100  | 6/6            | 6/6    | 6/6  | 0/6              | 3/6    | 3/6  | -     | 2.00                         | -                            |
| Ethirimol            | 1.00                                    | 10.0   | 50.0 | 6/6            | 6/6    | 6/6  | 0/6              | 6/6    | 6/6  | -     | 1.00                         | 10.0                         |
| Ethoprophos          | 1.00                                    | 10.0   | 50.0 | 6/6            | 6/6    | 6/6  | 0/6              | 6/6    | 6/6  | -     | 1.00                         | 10.0                         |
| Etobenzanid          | 4.00                                    | 40.0   | 200  | 6/6            | 6/6    | 6/6  | 0/6              | 6/6    | 6/6  | -     | 4.00                         | 40.0                         |
| Etrimfos             | 10.00                                   | 100    | 500  | 3/6            | 6/6    | 6/6  | 0/6              | 0/6    | 0/6  | -     | 100                          | -                            |
| Famphur              | 1.00                                    | 10.0   | 50.0 | 5/6            | 6/6    | 6/6  | 0/6              | 6/6    | 6/6  | -     | 10.0                         | 10.0                         |
| Fenamidone           | 1.00                                    | 10.0   | 50.0 | 6/6            | 6/6    | 6/6  | 0/6              | 6/6    | 6/6  | -     | 1.00                         | 10.0                         |
| Fenamiphos           | 1.00                                    | 10.0   | 50.0 | 1/6            | 6/6    | 6/6  | 0/6              | 6/6    | 6/6  | -     | 10.0                         | 10.0                         |
| Fenamiphos sulfone   | 1.00                                    | 10.0   | 50.0 | 6/6            | 6/6    | 6/6  | 0/6              | 6/6    | 6/6  | -     | 1.00                         | 10.0                         |
| Fenamiphos sulfoxide | 1.00                                    | 10.0   | 50.0 | 6/6            | 6/6    | 6/6  | 0/6              | 6/6    | 6/6  | -     | 1.00                         | 10.0                         |
| Fenarimol            | 8.40                                    | 84.0   | 420  | 6/6            | 6/6    | 6/6  | 3/6              | 6/6    | 6/6  | -     | 8.40                         | 84.0                         |
| Fenazaquin           | 2.00                                    | 20.0   | 100  | 5/6            | 6/6    | 6/6  | 0/6              | 0/6    | 3/6  | -     | 20.0                         | -                            |
| Fenbuconazole        | 1.00                                    | 10.0   | 50.0 | 6/6            | 6/6    | 6/6  | 0/6              | 6/6    | 6/6  | -     | 1.00                         | 10.0                         |
| Fenfuram             | 1.00                                    | 10.0   | 50.0 | 6/6            | 6/6    | 6/6  | 6/6              | 6/6    | 6/6  | -     | 1.00                         | 1.00                         |
| Fenobucarb           | 2.00                                    | 20.0   | 100  | 6/6            | 6/6    | 6/6  | 6/6              | 6/6    | 6/6  | -     | 2.00                         | 2.00                         |
| Fenothiocarb         | 1.00                                    | 10.0   | 50.0 | 6/6            | 6/6    | 6/6  | 0/6              | 6/6    | 6/6  | -     | 1.00                         | 10.0                         |
| Fenoxanil            | 2.00                                    | 20.0   | 100  | 5/6            | 6/6    | 6/6  | 0/6              | 6/6    | 6/6  | -     | 20.0                         | 20.0                         |
| Fenpropidin          | 1.00                                    | 10.0   | 50.0 | 4/6            | 6/6    | 6/6  | 0/6              | 6/6    | 6/6  | -     | 10.0                         | 10.0                         |
| Fenpyroximate        | 1.00                                    | 10.0   | 50.0 | 5/6            | 6/6    | 6/6  | 0/6              | 3/6    | 6/6  | -     | 10.0                         | 50.0                         |

| Compound             | Spiked Levels ( $\mu\text{g kg}^{-1}$ ) |        |      | Detected (n=6) |        |      | Identified (n=6) |        |      | Blank | SDL<br>$\mu\text{g kg}^{-1}$ | LOI<br>$\mu\text{g kg}^{-1}$ |
|----------------------|-----------------------------------------|--------|------|----------------|--------|------|------------------|--------|------|-------|------------------------------|------------------------------|
|                      | Low                                     | Middle | High | Low            | Middle | High | Low              | Middle | High |       |                              |                              |
| Fensulfothion        | 1.00                                    | 10.0   | 50.0 | 6/6            | 6/6    | 6/6  | 0/6              | 6/6    | 6/6  | -     | 1.00                         | 10.0                         |
| Fenthion sulfoxide   | 1.00                                    | 10.0   | 50.0 | 6/6            | 6/6    | 6/6  | 6/6              | 6/6    | 6/6  | -     | 1.00                         | 1.00                         |
| Fenuron              | 1.00                                    | 10.0   | 50.0 | 6/6            | 6/6    | 6/6  | 6/6              | 6/6    | 6/6  | -     | 1.00                         | 1.00                         |
| Flamprop             | 2.00                                    | 20.0   | 100  | 6/6            | 6/6    | 6/6  | 0/6              | 0/6    | 4/6  | -     | 2.00                         | -                            |
| Flamprop-methyl      | 1.00                                    | 10.0   | 50.0 | 6/6            | 6/6    | 6/6  | 0/6              | 6/6    | 6/6  | -     | 1.00                         | 10.0                         |
| Fluazifop-butyl      | 5.30                                    | 53.0   | 265  | 6/6            | 6/6    | 6/6  | 6/6              | 6/6    | 6/6  | -     | 5.30                         | 5.30                         |
| Flucycloxuron        | 1.00                                    | 10.0   | 50.0 | 4/6            | 6/6    | 6/6  | 0/6              | 1/6    | 6/6  | -     | 10.0                         | 50.0                         |
| Flufenacet           | 1.00                                    | 10.0   | 50.0 | 6/6            | 6/6    | 6/6  | 2/6              | 6/6    | 6/6  | -     | 1.00                         | 10.0                         |
| Flufenoxuron         | 1.00                                    | 10.0   | 50.0 | 4/6            | 6/6    | 6/6  | 0/6              | 3/6    | 6/6  | -     | 10.0                         | 50.0                         |
| Flumiclorac-pentyl   | 1.00                                    | 10.0   | 50.0 | 3/6            | 6/6    | 6/6  | 0/6              | 0/6    | 0/6  | -     | 10.0                         | -                            |
| Fluometuron          | 1.00                                    | 10.0   | 50.0 | 6/6            | 6/6    | 6/6  | 3/6              | 6/6    | 6/6  | -     | 1.00                         | 10.0                         |
| Fluquinconazole      | 5.00                                    | 50.0   | 250  | 5/6            | 6/6    | 6/6  | 0/6              | 6/6    | 6/6  | -     | 50.0                         | 50.0                         |
| Fluridone            | 1.00                                    | 10.0   | 50.0 | 6/6            | 6/6    | 6/6  | 6/6              | 6/6    | 6/6  | -     | 1.00                         | 1.00                         |
| Flurtamone           | 1.00                                    | 10.0   | 50.0 | 6/6            | 6/6    | 6/6  | 6/6              | 6/6    | 6/6  | -     | 1.00                         | 1.00                         |
| Flusilazole          | 1.00                                    | 10.0   | 50.0 | 6/6            | 6/6    | 6/6  | 0/6              | 6/6    | 6/6  | -     | 1.00                         | 10.0                         |
| Flutolanil           | 1.00                                    | 10.0   | 50.0 | 3/6            | 6/6    | 6/6  | 0/6              | 6/6    | 6/6  | -     | 10.0                         | 10.0                         |
| Flutriafol           | 1.00                                    | 10.0   | 50.0 | 6/6            | 6/6    | 6/6  | 3/6              | 6/6    | 6/6  | -     | 1.00                         | 10.0                         |
| Fonofos              | 4.00                                    | 40.0   | 200  | 4/6            | 6/6    | 6/6  | 0/6              | 6/6    | 6/6  | -     | 40.0                         | 40.0                         |
| Forchlorfenuron      | 1.00                                    | 10.0   | 50.0 | 6/6            | 6/6    | 6/6  | 6/6              | 6/6    | 6/6  | -     | 1.00                         | 1.00                         |
| Fosthiazate          | 1.00                                    | 10.0   | 50.0 | 6/6            | 6/6    | 6/6  | 3/6              | 6/6    | 6/6  | -     | 1.00                         | 10.0                         |
| Furalaxyl            | 1.00                                    | 10.0   | 50.0 | 6/6            | 6/6    | 6/6  | 6/6              | 6/6    | 6/6  | -     | 1.00                         | 1.00                         |
| Furathiocarb         | 1.00                                    | 10.0   | 50.0 | 6/6            | 6/6    | 6/6  | 3/6              | 6/6    | 6/6  | -     | 1.00                         | 10.0                         |
| Furmecyclox          | 1.00                                    | 10.0   | 50.0 | 2/6            | 6/6    | 6/6  | 0/6              | 6/6    | 6/6  | -     | 10.0                         | 10.0                         |
| Haloxyfop-ehoxyethyl | 1.00                                    | 10.0   | 50.0 | 3/6            | 6/6    | 6/6  | 0/6              | 3/6    | 6/6  | -     | 10.0                         | 50.0                         |
| Haloxyfop-methyl     | 2.00                                    | 20.0   | 100  | 6/6            | 6/6    | 6/6  | 0/6              | 6/6    | 6/6  | -     | 2.00                         | 20.0                         |
| Heptenophos          | 1.00                                    | 10.0   | 50.0 | 6/6            | 6/6    | 6/6  | 0/6              | 6/6    | 6/6  | -     | 1.00                         | 10.0                         |
| Hexaconazole         | 1.00                                    | 10.0   | 50.0 | 6/6            | 6/6    | 6/6  | 0/6              | 0/6    | 6/6  | -     | 1.00                         | 50.0                         |
| Hexazinone           | 1.00                                    | 10.0   | 50.0 | 3/6            | 6/6    | 6/6  | 0/6              | 6/6    | 6/6  | -     | 10.0                         | 10.0                         |
| Hexythiazox          | 2.00                                    | 20.0   | 100  | 3/6            | 6/6    | 6/6  | 0/6              | 0/6    | 0/6  | -     | 20.0                         | -                            |
| Imazalil             | 1.00                                    | 10.0   | 50.0 | 3/3            | 3/3    | 3/3  | 1/3              | 3/3    | 3/3  | 3     | ?                            | ?                            |
| Imazapic             | 1.00                                    | 10.0   | 50.0 | 6/6            | 6/6    | 6/6  | 3/6              | 4/6    | 6/6  | -     | 1.00                         | 50.0                         |
| Imazethapyr          | 1.00                                    | 10.0   | 50.0 | 3/6            | 6/6    | 6/6  | 0/6              | 2/6    | 6/6  | -     | 10.0                         | 50.0                         |
| Imidacloprid         | 3.40                                    | 34.0   | 170  | 3/6            | 6/6    | 6/6  | 0/6              | 6/6    | 6/6  | -     | 34.0                         | 34.0                         |
| Indoxacarb           | 1.00                                    | 10.0   | 50.0 | 6/6            | 6/6    | 6/6  | 0/6              | 6/6    | 6/6  | -     | 1.00                         | 10.0                         |
| Iprobenfos           | 2.00                                    | 20.0   | 100  | 6/6            | 6/6    | 6/6  | 0/6              | 6/6    | 6/6  | -     | 2.00                         | 20.0                         |
| Iprovalicarb         | 2.00                                    | 20.0   | 100  | 6/6            | 6/6    | 6/6  | 0/6              | 6/6    | 6/6  | -     | 2.00                         | 20.0                         |
| Isazofos             | 1.00                                    | 10.0   | 50.0 | 6/6            | 6/6    | 6/6  | 6/6              | 6/6    | 6/6  | -     | 1.00                         | 1.00                         |
| Isocarbamid          | 2.00                                    | 20.0   | 100  | 6/6            | 6/6    | 6/6  | 0/6              | 6/6    | 6/6  | -     | 2.00                         | 20.0                         |
| Isufenphos oxon      | 1.00                                    | 10.0   | 50.0 | 6/6            | 6/6    | 6/6  | 0/6              | 6/6    | 6/6  | -     | 1.00                         | 10.0                         |
| Isomethiozin         | 1.80                                    | 18.0   | 90.0 | 0/6            | 6/6    | 6/6  | 0/6              | 0/6    | 0/6  | -     | 18.0                         | -                            |
| Isoprocab            | 1.00                                    | 10.0   | 50.0 | 3/6            | 6/6    | 6/6  | 0/6              | 6/6    | 6/6  | -     | 10.0                         | 10.0                         |
| Isopropalin          | 1.00                                    | 10.0   | 50.0 | 0/6            | 6/6    | 6/6  | 0/6              | 0/6    | 1/6  | -     | 10.0                         | -                            |
| Isoprothiolane       | 1.00                                    | 10.0   | 50.0 | 6/6            | 6/6    | 6/6  | 6/6              | 6/6    | 6/6  | -     | 1.00                         | 1.00                         |

| Compound             | Spiked Levels ( $\mu\text{g kg}^{-1}$ ) |        |      | Detected (n=6) |        |      | Identified (n=6) |        |      | Blank | SDL<br>$\mu\text{g kg}^{-1}$ | LOI<br>$\mu\text{g kg}^{-1}$ |
|----------------------|-----------------------------------------|--------|------|----------------|--------|------|------------------|--------|------|-------|------------------------------|------------------------------|
|                      | Low                                     | Middle | High | Low            | Middle | High | Low              | Middle | High |       |                              |                              |
| Isoproturon          | 1.00                                    | 10.0   | 50.0 | 4/6            | 6/6    | 6/6  | 0/6              | 6/6    | 6/6  | -     | 10.0                         | 10.0                         |
| Isouron              | 1.00                                    | 10.0   | 50.0 | 6/6            | 6/6    | 6/6  | 6/6              | 6/6    | 6/6  | -     | 1.00                         | 1.00                         |
| Isoxaben             | 1.00                                    | 10.0   | 50.0 | 6/6            | 6/6    | 6/6  | 0/6              | 6/6    | 6/6  | -     | 1.00                         | 10.0                         |
| Isoxadifen-ethyl     | 4.00                                    | 40.0   | 200  | 3/6            | 6/6    | 6/6  | 0/6              | 0/6    | 0/6  | -     | 40.0                         | -                            |
| Isoxathion           | 1.00                                    | 10.0   | 50.0 | 6/6            | 6/6    | 6/6  | 6/6              | 6/6    | 6/6  | -     | 1.00                         | 1.00                         |
| Kadethrin            | 1.00                                    | 10.0   | 50.0 | 3/6            | 6/6    | 6/6  | 0/6              | 2/6    | 3/6  | -     | 10.0                         | -                            |
| Karbutilate          | 1.00                                    | 10.0   | 50.0 | 6/6            | 6/6    | 6/6  | 6/6              | 6/6    | 6/6  | -     | 1.00                         | 1.00                         |
| Kresoxim-methyl      | 2.00                                    | 20.0   | 100  | 4/6            | 6/6    | 6/6  | 0/6              | 6/6    | 6/6  | -     | 20.0                         | 20.0                         |
| Lactofen             | 6.00                                    | 60.0   | 300  | 3/6            | 6/6    | 6/6  | 0/6              | 0/6    | 0/6  | -     | 60.0                         | -                            |
| Linuron              | 1.00                                    | 10.0   | 50.0 | 6/6            | 6/6    | 6/6  | 0/6              | 6/6    | 6/6  | -     | 1.00                         | 10.0                         |
| Malaoxon             | 1.00                                    | 10.0   | 50.0 | 6/6            | 6/6    | 6/6  | 3/6              | 6/6    | 6/6  | -     | 1.00                         | 10.0                         |
| Malathion            | 1.00                                    | 10.0   | 50.0 | 6/6            | 6/6    | 6/6  | 0/6              | 0/6    | 0/6  | -     | 1.00                         | -                            |
| Mecarbam             | 1.00                                    | 10.0   | 50.0 | 6/6            | 6/6    | 6/6  | 0/6              | 6/6    | 6/6  | -     | 1.00                         | 10.0                         |
| Mefenacet            | 1.00                                    | 10.0   | 50.0 | 6/6            | 6/6    | 6/6  | 6/6              | 6/6    | 6/6  | -     | 1.00                         | 1.00                         |
| Mepanipyrim          | 1.00                                    | 10.0   | 50.0 | 6/6            | 6/6    | 6/6  | 0/6              | 6/6    | 6/6  | -     | 1.00                         | 10.0                         |
| Mephosfolan          | 1.00                                    | 10.0   | 50.0 | 6/6            | 6/6    | 6/6  | 3/6              | 6/6    | 6/6  | -     | 1.00                         | 10.0                         |
| Mepiquat chloride    | 1.00                                    | 10.0   | 50.0 | 4/6            | 6/6    | 6/6  | 0/6              | 6/6    | 6/6  | -     | 10.0                         | 10.0                         |
| Mepronil             | 1.00                                    | 10.0   | 50.0 | 6/6            | 6/6    | 6/6  | 6/6              | 6/6    | 6/6  | -     | 1.00                         | 1.00                         |
| Mesosulfuron-methyl  | 1.00                                    | 10.0   | 50.0 | 0/6            | 2/6    | 6/6  | 0/6              | 0/6    | 0/6  | -     | 50.0                         | -                            |
| Metalaxyl            | 1.00                                    | 10.0   | 50.0 | 6/6            | 6/6    | 6/6  | 6/6              | 6/6    | 6/6  | -     | 1.00                         | 1.00                         |
| Metamitron           | 1.00                                    | 10.0   | 50.0 | 6/6            | 6/6    | 6/6  | 0/6              | 0/6    | 3/6  | -     | 1.00                         | -                            |
| Metazachlor          | 1.00                                    | 10.0   | 50.0 | 3/6            | 6/6    | 6/6  | 0/6              | 6/6    | 6/6  | -     | 10.0                         | 10.0                         |
| Metconazole          | 1.00                                    | 10.0   | 50.0 | 6/6            | 6/6    | 6/6  | 0/6              | 6/6    | 6/6  | -     | 1.00                         | 10.0                         |
| Methabenzthiazuron   | 1.00                                    | 10.0   | 50.0 | 6/6            | 6/6    | 6/6  | 3/6              | 6/6    | 6/6  | -     | 1.00                         | 10.0                         |
| Methamidophos        | 2.00                                    | 20.0   | 100  | 3/6            | 6/6    | 6/6  | 0/6              | 3/6    | 6/6  | -     | 20.0                         | 100                          |
| Methiocarb           | 2.00                                    | 20.0   | 100  | 3/6            | 3/6    | 6/6  | 0/6              | 0/6    | 6/6  | -     | 100                          | 100                          |
| Methiocarb sulfoxide | 1.00                                    | 10.0   | 50.0 | 6/6            | 6/6    | 6/6  | 3/6              | 6/6    | 6/6  | -     | 1.00                         | 10.0                         |
| Methomyl             | 1.00                                    | 10.0   | 50.0 | 3/6            | 6/6    | 6/6  | 0/6              | 4/6    | 6/6  | -     | 10.0                         | 50.0                         |
| Methoprotryne        | 1.00                                    | 10.0   | 50.0 | 6/6            | 6/6    | 6/6  | 6/6              | 6/6    | 6/6  | -     | 1.00                         | 1.00                         |
| Metobromuron         | 1.00                                    | 10.0   | 50.0 | 6/6            | 6/6    | 6/6  | 0/6              | 3/6    | 6/6  | -     | 1.00                         | 50.0                         |
| Metolachlor          | 1.00                                    | 10.0   | 50.0 | 6/6            | 6/6    | 6/6  | 6/6              | 6/6    | 6/6  | -     | 1.00                         | 1.00                         |
| Metoxuron            | 1.00                                    | 10.0   | 50.0 | 0/6            | 0/6    | 0/6  | 0/6              | 0/6    | 0/6  | -     | -                            | -                            |
| Metribuzin           | 7.80                                    | 78.0   | 390  | 0/6            | 0/6    | 6/6  | 0/6              | 0/6    | 6/6  | -     | 390                          | 390                          |
| Mexacarbate          | 1.00                                    | 10.0   | 50.0 | 0/6            | 0/6    | 3/6  | 0/6              | 0/6    | 6/6  | -     | -                            | 50.0                         |
| Monocrotophos        | 1.00                                    | 10.0   | 50.0 | 6/6            | 6/6    | 6/6  | 6/6              | 6/6    | 6/6  | -     | 1.00                         | 1.00                         |
| Monuron              | 1.00                                    | 10.0   | 50.0 | 6/6            | 6/6    | 6/6  | 0/6              | 6/6    | 6/6  | -     | 1.00                         | 10.0                         |
| Myclobutanil         | 1.00                                    | 10.0   | 50.0 | 6/6            | 6/6    | 6/6  | 0/6              | 6/6    | 6/6  | -     | 1.00                         | 10.0                         |
| Napropamide          | 1.00                                    | 10.0   | 50.0 | 6/6            | 6/6    | 6/6  | 6/6              | 6/6    | 6/6  | -     | 1.00                         | 1.00                         |
| Neburon              | 2.00                                    | 20.0   | 100  | 6/6            | 6/6    | 6/6  | 0/6              | 6/6    | 6/6  | -     | 2.00                         | 20.0                         |
| Norflurazon          | 1.00                                    | 10.0   | 50.0 | 6/6            | 6/6    | 6/6  | 0/6              | 6/6    | 6/6  | -     | 1.00                         | 10.0                         |
| Nuarimol             | 1.00                                    | 10.0   | 50.0 | 6/6            | 6/6    | 6/6  | 0/6              | 6/6    | 6/6  | -     | 1.00                         | 10.0                         |
| Octhilinone          | 1.00                                    | 10.0   | 50.0 | 6/6            | 6/6    | 6/6  | 6/6              | 6/6    | 6/6  | -     | 1.00                         | 1.00                         |
| Ofurace              | 1.00                                    | 10.0   | 50.0 | 6/6            | 6/6    | 6/6  | 3/6              | 6/6    | 6/6  | -     | 1.00                         | 10.0                         |

| Compound                       | Spiked Levels ( $\mu\text{g kg}^{-1}$ ) |        |      | Detected (n=6) |        |      | Identified (n=6) |        |      | Blank | SDL<br>$\mu\text{g kg}^{-1}$ | LOI<br>$\mu\text{g kg}^{-1}$ |
|--------------------------------|-----------------------------------------|--------|------|----------------|--------|------|------------------|--------|------|-------|------------------------------|------------------------------|
|                                | Low                                     | Middle | High | Low            | Middle | High | Low              | Middle | High |       |                              |                              |
| Omethoate                      | 1.00                                    | 10.0   | 50.0 | 6/6            | 6/6    | 6/6  | 3/6              | 6/6    | 6/6  | -     | 1.00                         | 10.0                         |
| Orbencarb                      | 2.00                                    | 20.0   | 100  | 6/6            | 6/6    | 6/6  | 4/6              | 6/6    | 6/6  | -     | 2.00                         | 20.0                         |
| Oxadixyl                       | 1.00                                    | 10.0   | 50.0 | 6/6            | 6/6    | 6/6  | 0/6              | 6/6    | 6/6  | -     | 1.00                         | 10.0                         |
| Oxycarboxin                    | 1.00                                    | 10.0   | 50.0 | 6/6            | 6/6    | 6/6  | 3/6              | 6/6    | 6/6  | -     | 1.00                         | 10.0                         |
| Paclobutrazol                  | 1.00                                    | 10.0   | 50.0 | 6/6            | 6/6    | 6/6  | 3/6              | 6/6    | 6/6  | -     | 1.00                         | 10.0                         |
| Paraoxon-ethyl                 | 1.00                                    | 10.0   | 50.0 | 5/6            | 6/6    | 6/6  | 0/6              | 0/6    | 3/6  | -     | 10.0                         | -                            |
| Pebulate                       | 15.00                                   | 150    | 750  | 1/6            | 6/6    | 6/6  | 0/6              | 6/6    | 6/6  | -     | 150                          | 150                          |
| Penconazole                    | 1.00                                    | 10.0   | 50.0 | 6/6            | 6/6    | 6/6  | 0/6              | 6/6    | 6/6  | -     | 1.00                         | 10.0                         |
| Pencycuron                     | 1.00                                    | 10.0   | 50.0 | 4/6            | 6/6    | 6/6  | 0/6              | 6/6    | 6/6  | -     | 10.0                         | 10.0                         |
| Pentachlor                     | 1.00                                    | 10.0   | 50.0 | 3/6            | 6/6    | 6/6  | 0/6              | 6/6    | 6/6  | -     | 10.0                         | 10.0                         |
| Phenmedipham                   | 1.00                                    | 10.0   | 50.0 | 5/6            | 6/6    | 6/6  | 0/6              | 6/6    | 6/6  | -     | 10.0                         | 10.0                         |
| Phenthoate                     | 1.00                                    | 10.0   | 50.0 | 6/6            | 6/6    | 6/6  | 0/6              | 6/6    | 6/6  | -     | 1.00                         | 10.0                         |
| Phorate sulfone                | 1.00                                    | 10.0   | 50.0 | 6/6            | 6/6    | 6/6  | 0/6              | 0/6    | 6/6  | -     | 1.00                         | 50.0                         |
| Phorate sulfoxide              | 1.00                                    | 10.0   | 50.0 | 6/6            | 6/6    | 6/6  | 6/6              | 6/6    | 6/6  | -     | 1.00                         | 1.00                         |
| Phosalone                      | 3.00                                    | 30.0   | 150  | 3/6            | 6/6    | 6/6  | 0/6              | 0/6    | 0/6  | -     | 30.0                         | -                            |
| Phosphamidon                   | 1.00                                    | 10.0   | 50.0 | 6/6            | 6/6    | 6/6  | 3/6              | 6/6    | 6/6  | -     | 1.00                         | 10.0                         |
| Phoxim                         | 4.00                                    | 40.0   | 200  | 2/6            | 6/6    | 6/6  | 0/6              | 0/6    | 0/6  | -     | 40.0                         | -                            |
| Picolinafen                    | 1.00                                    | 10.0   | 50.0 | 3/6            | 6/6    | 6/6  | 0/6              | 0/6    | 0/6  | -     | 10.0                         | -                            |
| Picoxystrobin                  | 1.00                                    | 10.0   | 50.0 | 5/6            | 6/6    | 6/6  | 0/6              | 0/6    | 6/6  | -     | 10.0                         | 50.0                         |
| Piperonyl-butoxide             | 1.00                                    | 10.0   | 50.0 | 6/6            | 6/6    | 6/6  | 0/6              | 6/6    | 6/6  | -     | 1.00                         | 10.0                         |
| Piperophos                     | 1.00                                    | 10.0   | 50.0 | 6/6            | 6/6    | 6/6  | 6/6              | 6/6    | 6/6  | -     | 1.00                         | 1.00                         |
| Pirimicarb-desmethyl-formamido | 1.00                                    | 10.0   | 50.0 | 6/6            | 6/6    | 6/6  | 3/6              | 6/6    | 6/6  | -     | 1.00                         | 10.0                         |
| Pirimiphos-ethyl               | 1.00                                    | 10.0   | 50.0 | 6/6            | 6/6    | 6/6  | 6/6              | 6/6    | 6/6  | -     | 1.00                         | 1.00                         |
| Pirimiphos-methyl              | 1.00                                    | 10.0   | 50.0 | 6/6            | 6/6    | 6/6  | 3/6              | 6/6    | 6/6  | -     | 1.00                         | 10.0                         |
| Pretilachlor                   | 1.00                                    | 10.0   | 50.0 | 1/6            | 6/6    | 6/6  | 0/6              | 6/6    | 6/6  | -     | 10.0                         | 10.0                         |
| Prochloraz                     | 1.00                                    | 10.0   | 50.0 | 2/2            | 2/2    | 2/2  | 2/2              | 2/2    | 2/2  | 4     | ?                            | ?                            |
| Profenofos                     | 2.00                                    | 20.0   | 100  | 3/6            | 6/6    | 6/6  | 0/6              | 0/6    | 0/6  | -     | 20.0                         | -                            |
| Prometon                       | 1.00                                    | 10.0   | 50.0 | 6/6            | 6/6    | 6/6  | 3/6              | 6/6    | 6/6  | -     | 1.00                         | 10.0                         |
| Prometryn                      | 1.00                                    | 10.0   | 50.0 | 6/6            | 6/6    | 6/6  | 6/6              | 6/6    | 6/6  | -     | 1.00                         | 1.00                         |
| Pronamide                      | 1.00                                    | 10.0   | 50.0 | 6/6            | 6/6    | 6/6  | 0/6              | 6/6    | 6/6  | -     | 1.00                         | 10.0                         |
| Propamocarb                    | 1.00                                    | 10.0   | 50.0 | 4/5            | 5/5    | 5/5  | 4/5              | 5/5    | 5/5  | 1     | 10.0                         | 10.0                         |
| Propanil                       | 5.00                                    | 50.0   | 250  | 6/6            | 6/6    | 6/6  | 3/6              | 6/6    | 6/6  | -     | 5.00                         | 50.0                         |
| Propaphos                      | 1.00                                    | 10.0   | 50.0 | 6/6            | 6/6    | 6/6  | 6/6              | 6/6    | 6/6  | -     | 1.00                         | 1.00                         |
| Propaquizafop                  | 1.00                                    | 10.0   | 50.0 | 6/6            | 6/6    | 6/6  | 0/6              | 6/6    | 6/6  | -     | 1.00                         | 10.0                         |
| Propargite                     | 1.00                                    | 10.0   | 50.0 | 0/6            | 6/6    | 6/6  | 0/6              | 0/6    | 6/6  | -     | 10.0                         | 50.0                         |
| Propazine                      | 1.00                                    | 10.0   | 50.0 | 6/6            | 6/6    | 6/6  | 6/6              | 6/6    | 6/6  | -     | 1.00                         | 1.00                         |
| Propiconazole                  | 1.00                                    | 10.0   | 50.0 | 5/6            | 6/6    | 6/6  | 0/6              | 6/6    | 6/6  | -     | 10.0                         | 10.0                         |
| Propisochlor                   | 1.00                                    | 10.0   | 50.0 | 5/6            | 6/6    | 6/6  | 0/6              | 6/6    | 6/6  | -     | 10.0                         | 10.0                         |
| Propoxur                       | 1.00                                    | 10.0   | 50.0 | 3/6            | 6/6    | 6/6  | 0/6              | 6/6    | 6/6  | -     | 10.0                         | 10.0                         |
| Pyraclofos                     | 1.00                                    | 10.0   | 50.0 | 6/6            | 6/6    | 6/6  | 3/6              | 6/6    | 6/6  | -     | 1.00                         | 10.0                         |
| Pyraclostrobin                 | 1.00                                    | 10.0   | 50.0 | 6/6            | 6/6    | 6/6  | 6/6              | 6/6    | 6/6  | -     | 1.00                         | 1.00                         |
| Pyraflufen-ethyl               | 1.00                                    | 10.0   | 50.0 | 6/6            | 6/6    | 6/6  | 0/6              | 6/6    | 6/6  | -     | 1.00                         | 10.0                         |
| Pyrazophos                     | 1.00                                    | 10.0   | 50.0 | 3/6            | 6/6    | 6/6  | 0/6              | 6/6    | 6/6  | -     | 10.0                         | 10.0                         |

| Compound            | Spiked Levels ( $\mu\text{g kg}^{-1}$ ) |        |      | Detected (n=6) |        |      | Identified (n=6) |        |      | Blank | SDL<br>$\mu\text{g kg}^{-1}$ | LOI<br>$\mu\text{g kg}^{-1}$ |
|---------------------|-----------------------------------------|--------|------|----------------|--------|------|------------------|--------|------|-------|------------------------------|------------------------------|
|                     | Low                                     | Middle | High | Low            | Middle | High | Low              | Middle | High |       |                              |                              |
| Pyrazoxyfen         | 1.00                                    | 10.0   | 50.0 | 6/6            | 6/6    | 6/6  | 0/6              | 6/6    | 6/6  | -     | 1.00                         | 10.0                         |
| Pyributicarb        | 1.00                                    | 10.0   | 50.0 | 5/6            | 6/6    | 6/6  | 0/6              | 6/6    | 6/6  | -     | 10.0                         | 10.0                         |
| Pyridaben           | 1.00                                    | 10.0   | 50.0 | 5/6            | 6/6    | 6/6  | 0/6              | 6/6    | 6/6  | -     | 10.0                         | 10.0                         |
| Pyridalyl           | 1.00                                    | 10.0   | 50.0 | 5/6            | 6/6    | 6/6  | 0/6              | 0/6    | 3/6  | -     | 10.0                         | -                            |
| Pyridaphenthion     | 1.00                                    | 10.0   | 50.0 | 6/6            | 6/6    | 6/6  | 6/6              | 6/6    | 6/6  | -     | 1.00                         | 1.00                         |
| Pyrimethanil        | 1.00                                    | 10.0   | 50.0 | 6/6            | 6/6    | 6/6  | 6/6              | 6/6    | 6/6  | -     | 1.00                         | 1.00                         |
| Pyrimidifen         | 1.00                                    | 10.0   | 50.0 | 6/6            | 6/6    | 6/6  | 6/6              | 6/6    | 6/6  | -     | 1.00                         | 1.00                         |
| Pyriproxyfen        | 1.00                                    | 10.0   | 50.0 | 6/6            | 6/6    | 6/6  | 6/6              | 6/6    | 6/6  | -     | 1.00                         | 1.00                         |
| Pyroquilon          | 1.00                                    | 10.0   | 50.0 | 6/6            | 6/6    | 6/6  | 6/6              | 6/6    | 6/6  | -     | 1.00                         | 1.00                         |
| Quinalphos          | 1.00                                    | 10.0   | 50.0 | 6/6            | 6/6    | 6/6  | 0/6              | 6/6    | 6/6  | -     | 1.00                         | 10.0                         |
| Quinoclamine        | 3.00                                    | 30.0   | 150  | 5/6            | 6/6    | 6/6  | 0/6              | 0/6    | 6/6  | -     | 30.0                         | 150                          |
| Quinoxiphen         | 1.00                                    | 10.0   | 50.0 | 6/6            | 6/6    | 6/6  | 0/6              | 6/6    | 6/6  | -     | 1.00                         | 10.0                         |
| Quizalofop-ethyl    | 1.00                                    | 10.0   | 50.0 | 5/6            | 6/6    | 6/6  | 0/6              | 6/6    | 6/6  | -     | 10.0                         | 10.0                         |
| Rabenzazole         | 1.00                                    | 10.0   | 50.0 | 6/6            | 6/6    | 6/6  | 0/6              | 6/6    | 6/6  | -     | 1.00                         | 10.0                         |
| Rotenone            | 1.00                                    | 10.0   | 50.0 | 1/6            | 6/6    | 6/6  | 0/6              | 4/6    | 6/6  | -     | 10.0                         | 50.0                         |
| Sebutylazine        | 1.00                                    | 10.0   | 50.0 | 6/6            | 6/6    | 6/6  | 3/6              | 6/6    | 6/6  | -     | 1.00                         | 10.0                         |
| Secbumeton          | 1.00                                    | 10.0   | 50.0 | 6/6            | 6/6    | 6/6  | 3/6              | 6/6    | 6/6  | -     | 1.00                         | 10.0                         |
| Simazine            | 1.00                                    | 10.0   | 50.0 | 6/6            | 6/6    | 6/6  | 0/6              | 6/6    | 6/6  | -     | 1.00                         | 10.0                         |
| Simeconazole        | 1.00                                    | 10.0   | 50.0 | 5/6            | 6/6    | 6/6  | 0/6              | 1/6    | 4/6  | -     | 10.0                         | -                            |
| Simeton             | 1.00                                    | 10.0   | 50.0 | 3/6            | 6/6    | 6/6  | 0/6              | 6/6    | 6/6  | -     | 10.0                         | 10.0                         |
| Spinosad            | 1.00                                    | 10.0   | 50.0 | 6/6            | 6/6    | 6/6  | 6/6              | 6/6    | 6/6  | -     | 1.00                         | 1.00                         |
| Spiroxamine         | 2.00                                    | 20.0   | 100  | 3/6            | 6/6    | 6/6  | 0/6              | 6/6    | 6/6  | -     | 20.0                         | 20.0                         |
| Sulfentrazone       | 6.70                                    | 67.0   | 335  | 6/6            | 6/6    | 6/6  | 0/6              | 0/6    | 6/6  | -     | 6.70                         | 335                          |
| Sulfotep            | 1.60                                    | 16.0   | 80.0 | 6/6            | 6/6    | 6/6  | 0/6              | 6/6    | 6/6  | -     | 1.60                         | 16.0                         |
| Sulprofos           | 1.00                                    | 10.0   | 50.0 | 4/6            | 6/6    | 6/6  | 0/6              | 0/6    | 0/6  | -     | 10.0                         | -                            |
| Tebuconazole        | 1.00                                    | 10.0   | 50.0 | 6/6            | 6/6    | 6/6  | 0/6              | 3/6    | 6/6  | -     | 1.00                         | 50.0                         |
| Tebufenozide        | 1.00                                    | 10.0   | 50.0 | 0/6            | 3/6    | 6/6  | 0/6              | 0/6    | 6/6  | -     | 50.0                         | 50.0                         |
| Tebupirimfos        | 1.00                                    | 10.0   | 50.0 | 6/6            | 6/6    | 6/6  | 0/6              | 6/6    | 6/6  | -     | 1.00                         | 10.0                         |
| Tebutam             | 1.00                                    | 10.0   | 50.0 | 6/6            | 6/6    | 6/6  | 6/6              | 6/6    | 6/6  | -     | 1.00                         | 1.00                         |
| Temephos            | 2.00                                    | 20.0   | 100  | 3/6            | 6/6    | 6/6  | 0/6              | 0/6    | 0/6  | -     | 20.0                         | -                            |
| Terbucarb           | 1.00                                    | 10.0   | 50.0 | 0/6            | 6/6    | 6/6  | 0/6              | 6/6    | 6/6  | -     | 10.0                         | 10.0                         |
| Terbutylazine       | 1.00                                    | 10.0   | 50.0 | 6/6            | 6/6    | 6/6  | 3/6              | 6/6    | 6/6  | -     | 1.00                         | 10.0                         |
| Terbutryne          | 1.00                                    | 10.0   | 50.0 | 6/6            | 6/6    | 6/6  | 6/6              | 6/6    | 6/6  | -     | 1.00                         | 1.00                         |
| Tetrachlorvinphos   | 1.00                                    | 10.0   | 50.0 | 1/6            | 6/6    | 6/6  | 0/6              | 3/6    | 6/6  | -     | 10.0                         | 50.0                         |
| Tetraconazole       | 1.00                                    | 10.0   | 50.0 | 6/6            | 6/6    | 6/6  | 0/6              | 6/6    | 6/6  | -     | 1.00                         | 10.0                         |
| Tetramethrin        | 1.00                                    | 10.0   | 50.0 | 0/6            | 6/6    | 6/6  | 0/6              | 0/6    | 0/6  | -     | 10.0                         | -                            |
| Thiacloprid         | 1.00                                    | 10.0   | 50.0 | 6/6            | 6/6    | 6/6  | 0/6              | 6/6    | 6/6  | -     | 1.00                         | 10.0                         |
| Thiamethoxam        | 4.00                                    | 40.0   | 200  | 6/6            | 6/6    | 6/6  | 6/6              | 6/6    | 6/6  | -     | 4.00                         | 4.00                         |
| Thiazafluron        | 2.00                                    | 20.0   | 100  | 6/6            | 6/6    | 6/6  | 0/6              | 6/6    | 6/6  | -     | 2.00                         | 20.0                         |
| Thiazopyr           | 4.20                                    | 42.0   | 210  | 5/6            | 6/6    | 6/6  | 0/6              | 6/6    | 6/6  | -     | 42.0                         | 42.0                         |
| Thiobencarb         | 1.00                                    | 10.0   | 50.0 | 5/6            | 6/6    | 6/6  | 0/6              | 6/6    | 6/6  | -     | 10.0                         | 10.0                         |
| Thiofanox sulfone   | 1.00                                    | 10.0   | 50.0 | 0/6            | 6/6    | 6/6  | 0/6              | 6/6    | 6/6  | -     | 10.0                         | 10.0                         |
| Thiofanox sulfoxide | 1.00                                    | 10.0   | 50.0 | 3/6            | 6/6    | 6/6  | 0/6              | 4/6    | 6/6  | -     | 10.0                         | 50.0                         |

| Compound           | Spiked Levels ( $\mu\text{g kg}^{-1}$ ) |        |      | Detected (n=6) |        |      | Identified (n=6) |        |      | Blank | SDL<br>$\mu\text{g kg}^{-1}$ | LOI<br>$\mu\text{g kg}^{-1}$ |
|--------------------|-----------------------------------------|--------|------|----------------|--------|------|------------------|--------|------|-------|------------------------------|------------------------------|
|                    | Low                                     | Middle | High | Low            | Middle | High | Low              | Middle | High |       |                              |                              |
| Thionazin          | 2.00                                    | 20.0   | 100  | 6/6            | 6/6    | 6/6  | 0/6              | 6/6    | 6/6  | -     | 2.00                         | 20.0                         |
| Thiophanate-methyl | 1.00                                    | 10.0   | 50.0 | 6/6            | 6/6    | 6/6  | 6/6              | 6/6    | 6/6  | -     | 1.00                         | 1.00                         |
| Tiocabazil         | 1.00                                    | 10.0   | 50.0 | 5/6            | 6/6    | 6/6  | 0/6              | 6/6    | 6/6  | -     | 10.0                         | 10.0                         |
| Tolfenpyrad        | 1.00                                    | 10.0   | 50.0 | 3/6            | 6/6    | 6/6  | 0/6              | 6/6    | 6/6  | -     | 10.0                         | 10.0                         |
| Tralkoxydim        | 1.00                                    | 10.0   | 50.0 | 0/6            | 6/6    | 6/6  | 0/6              | 0/6    | 0/6  | -     | 10.0                         | -                            |
| Triadimefon        | 3.80                                    | 38.0   | 190  | 6/6            | 6/6    | 6/6  | 0/6              | 6/6    | 6/6  | -     | 3.80                         | 38.0                         |
| Triadimenol        | 1.00                                    | 10.0   | 50.0 | 0/6            | 3/6    | 6/6  | 0/6              | 0/6    | 6/6  | -     | 50.0                         | 50.0                         |
| Triapenthenol      | 1.00                                    | 10.0   | 50.0 | 6/6            | 6/6    | 6/6  | 6/6              | 6/6    | 6/6  | -     | 1.00                         | 1.00                         |
| Triazophos         | 1.00                                    | 10.0   | 50.0 | 6/6            | 6/6    | 6/6  | 3/6              | 6/6    | 6/6  | -     | 1.00                         | 10.0                         |
| Tribufos           | 1.00                                    | 10.0   | 50.0 | 6/6            | 6/6    | 6/6  | 0/6              | 6/6    | 6/6  | -     | 1.00                         | 10.0                         |
| Trichlorfon        | 5.00                                    | 50.0   | 250  | 6/6            | 6/6    | 6/6  | 0/6              | 1/6    | 6/6  | -     | 5.00                         | 250                          |
| Tricyclazole       | 1.00                                    | 10.0   | 50.0 | 6/6            | 6/6    | 6/6  | 6/6              | 6/6    | 6/6  | -     | 1.00                         | 1.00                         |
| Trietazine         | 1.00                                    | 10.0   | 50.0 | 6/6            | 6/6    | 6/6  | 4/6              | 6/6    | 6/6  | -     | 1.00                         | 10.0                         |
| Trifloxystrobin    | 4.00                                    | 40.0   | 200  | 6/6            | 6/6    | 6/6  | 3/6              | 6/6    | 6/6  | -     | 4.00                         | 40.0                         |
| Triflumizole       | 1.00                                    | 10.0   | 50.0 | 6/6            | 6/6    | 6/6  | 1/6              | 6/6    | 6/6  | -     | 1.00                         | 10.0                         |
| Triflumuron        | 2.20                                    | 22.0   | 110  | 2/6            | 6/6    | 6/6  | 0/6              | 3/6    | 6/6  | -     | 22.0                         | 110                          |
| Triticonazole      | 1.00                                    | 10.0   | 50.0 | 0/6            | 0/6    | 6/6  | 0/6              | 0/6    | 6/6  | -     | 50.0                         | 50.0                         |
| Vamidotion         | 1.00                                    | 10.0   | 50.0 | 6/6            | 6/6    | 6/6  | 6/6              | 6/6    | 6/6  | -     | 1.00                         | 1.00                         |
| Zoxamide           | 1.00                                    | 10.0   | 50.0 | 4/6            | 6/6    | 6/6  | 0/6              | 6/6    | 6/6  | -     | 10.0                         | 10.0                         |

<sup>a</sup> SDL of a given pesticide was established as the lowest spiked concentration level when the target analyte was detected in all test samples (i.e. 6 out of 6) by “MS<sup>1</sup> screening”.

<sup>b</sup> LOI was defined as the lowest spiked concentration level when the target analyte was identified by “the MS<sup>2</sup> spectral library matching”.
